# Supplementary material for: Chlorophyll tailored 20-trifluoroacetamide and its azacrown derivative as pH sensitive colorimetric sensor probe with response to AcO−, F− and CN− ions
Source: Royal Society of Chemistry journal article supplement (doi:10.1039/c3ra41741g), 2013-01-01
Supplement: c3ra41741g.pdf [file c3ra41741g.pdf]

## Supporting information

for

### Chlorophyll tailored 20-trifluoroacetamide and its azacrown derivative as pH sensitive colorimetric sensor probe with response to $\text{AcO}^-$ , $\text{F}^-$ and $\text{CN}^-$ ions

Vladimir Iashin, Tatyana V. Koso, Kati Stranius, Jari Kavakka, Sami Heikkinen, Nikolai Tkachenko and Juho Helaja\*

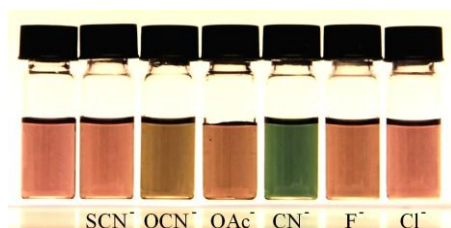

'Naked eye' detection of selected anions with sensor probe **4** ( $8,6 \cdot 10^{-5}$  M, 40 equiv. added potassium salt in DMF:H<sub>2</sub>O 7:3).

### Table of Contents

|                                            |    |
|--------------------------------------------|----|
| Synthesis and characterization data .....  | 2  |
| UV-vis spectra .....                       | 6  |
| Buffer titrations.....                     | 18 |
| NMR spectra .....                          | 21 |
| IR spectra .....                           | 27 |
| Computational methods .....                | 29 |
| Results.....                               | 29 |
| Computational References .....             | 31 |
| XYZ coordinates and absolute energies..... | 31 |

## Synthesis and characterization data

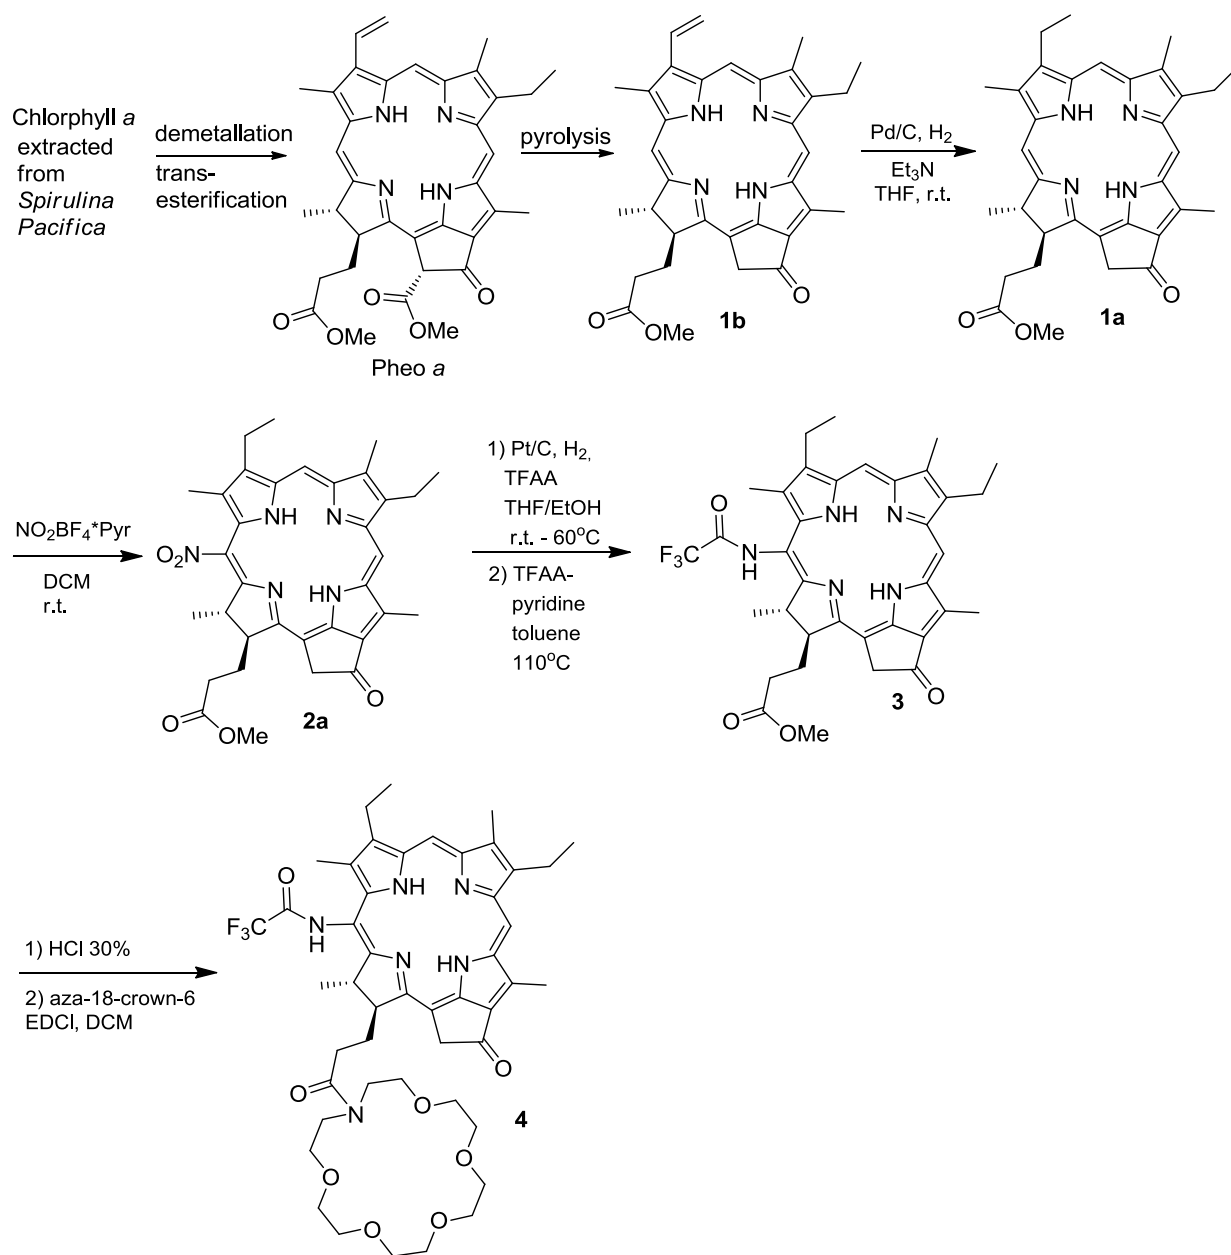

### Methyl pyropheorbide *a* (1b).

600 mg (1.0 mmol) of pure methyl pheophorbide *a* (Pheo *a*) was dissolved in 125 ml of pyridine and 0.18 ml (10.0 mmol) of dist. water was added. Argon was bubbled carefully through for 15 min and reaction mixture was then refluxed under argon atmosphere overnight. After reaction mixture was cooled, solvent was removed *in vacuo*. Flash column chromatography (eluent hexane/ethyl acetate, grad. 3:1 – 1:1) afforded 450 mg (84%) of

methyl pyropheophoride *a*;  $^1\text{H}$  NMR (300 MHz,  $\text{CDCl}_3$ ,  $27^\circ\text{C}$ )  $\delta$  9.48 (1H, s), 9.37 (1H, s), 8.54 (1H, s), 7.99 (1H, dd,  $^3J_{\text{trans}}=17.8$  Hz,  $^3J_{\text{cis}}=11.6$  Hz), 6.28 (1H, dd,  $^3J_{\text{trans}}=17.8$  Hz), 6.16 (1H, dd,  $^3J_{\text{cis}}=11.6$  Hz), 5.26 (1H, d,  $J=19.5$  Hz), 5.10 (1H, d,  $J=19.5$  Hz), 4.46 (1H, m), 4.29 (1H, m), 3.66 (3H, s), 3.63 (2H, q,  $J=7.6$  Hz), 3.61 (3H, s), 3.40 (3H, s), 3.22 (3H, s), 2.63 (2H, m), 2.30 (2H, m), 1.81 (3H, d,  $J=7.4$  Hz), 1.69 (3H, t,  $J=7.6$  Hz), 0.83 (1H, s), -0.69 (1H, s); was found to match literature values.<sup>6b</sup>

#### Methyl mesopyropheophorbide *a* (**1a**).

287.4 mg (0.525 mmol) of **1b** was dissolved in 125 ml of THF.  $\text{Et}_3\text{N}$  (30  $\mu\text{l}$ , 0.409 mmol) and 28.8 mg (10%<sub>mass</sub>) of 5% Pd/C were added to the solution. Resulting mixture was stirred at r.t. under  $\text{H}_2$  atmosphere for 24 h. After that solvent was evaporated and solid residue was purified with flash-column chromatography (silica, EtOAc:Hex 1:1) to obtain 259.5 mg (89.9 %) of **1a**;  $^1\text{H}$  NMR (300 MHz,  $\text{CDCl}_3$ ,  $27^\circ\text{C}$ )  $\delta$  9.44 (1H, s), 9.19 (1H, s), 8.45 (1H, s), 5.24 (1H, d,  $J=20.0$  Hz), 5.08 (1H, d,  $J=20.0$  Hz), 4.45 (1H, m), 4.27 (1H, m), 3.82 (2H, q,  $J=7.6$  Hz), 3.65 (3H, s), 3.63 (2H, q,  $J=7.6$  Hz), 3.62 (3H, s), 3.29 (3H, s), 3.24 (3H, s), 2.58 (2H, m), 2.29 (2H, m), 1.81 (3H, d,  $J=7.3$  Hz), 1.73 (3H, t,  $J=7.6$  Hz), 1.69 (3H, t,  $J=7.6$  Hz), 0.64 (1H, s), -1.60 (1H, s); was found to match literature values.<sup>6b</sup>

#### 20-nitro-mesopyropheophorbide *a* methyl ester (**2a**).

184.3 mg (0.335 mmol) of **1a** was dissolved in 50 ml of DCM and argon was bubbled through the reaction mixture over 20 min. Subsequently 71.1 mg (0.335 mmol) of  $\text{NO}_2\text{BF}_4$ \*pyridine complex was added and the mixture was stirred for 4.5 h at r.t. under argon atmosphere. After TLC monitoring indicated that starting material was consumed the mixture was transferred to separating funnel and washed with water and brine. Organic layer was then separated, solvent was evaporated and flash column chromatography (silica, EtOAc/Hex 1:1) was done to obtain 150.9 mg (75.6 %) of pure product; mp 134-137  $^\circ\text{C}$  (lit.,<sup>6b</sup> 145-146  $^\circ\text{C}$ );  $\lambda_{\text{max}}(\text{DCM})/\text{nm}$  408 ( $\epsilon/\text{dm}^3 \cdot \text{mol}^{-1} \cdot \text{cm}^{-1}$  62317), 507 (4876), 541 (6483), 615 (4166), 671 (25952);  $\nu_{\text{max}}/\text{cm}^{-1}$  2964, 2930 and 2872 (C-H), 1735 (C=O), 1694 (C=O) and 1350 (N=O);  $^1\text{H}$  NMR (300 MHz,  $\text{CDCl}_3$ ,  $27^\circ\text{C}$ )  $\delta$  9.41 (1H, s), 9.39 (1H, s), 5.18 (1H, d,  $J=20.1$  Hz), 5.11 (1H, d,  $J=20.1$  Hz), 4.74 (1H, m), 4.23 (1H, m), 3.80 (2H, q,  $J=15.9, 7.5$  Hz), 3.60 (3H, s), 3.58 (2H, q,  $J=15.9, 7.5$  Hz), 3.56 (3H, s), 3.18 (3H, s), 3.09 (3H, s), 2.55 (2H, m), 2.17 (2H, m), 1.70 (3H, t,  $J=7.5$  Hz), 1.65 (3H, t,  $J=7.5$  Hz), 1.53 (2H, d,  $J=7.1$  Hz), 0.82 (1H, s), -1.88 (1H, s); was found to match literature values<sup>6b</sup>;  $^{13}\text{C}$  NMR (300 MHz,  $\text{CDCl}_3$ ,  $27^\circ\text{C}$ )  $\delta$  195.6, 173.4, 163.8, 161.8, 154.0, 151.7, 149.2, 145.2, 144.9, 139.2, 136.8, 135.0, 134.2, 131.8,

130.8, 128.1, 126.9, 107.2, 105.8, 100.8, 52.7, 51.9, 48.3, 48.0, 30.9, 30.0, 21.9, 19.5, 19.4, 17.5, 17.1, 12.1, 11.3, 11.2; ESI-MS ( $M^+$ ) 596.2860 (calc. for  $C_{34}H_{38}N_5O_5$  596.2867).

**Methyl 20-trifluoroacetamidemesopyropheorbide a (3):**

In 2-neck flask, equipped with septum, to the solution of 30 mg (0.05mmol) of **2a** in 20ml of dry THF/EtOH (1:1) were added 3 mg of Pt/C. Air was removed from the reaction mixture by argon bubbling over 20 min then the mixture was set under  $H_2$ -atmosphere and stirred for 1h. After TLC monitoring indicated that the starting material was consumed, the atmosphere was changed back to argon, 8.5  $\mu$ l (6 mmol) of TFA were injected into reaction vessel, temperature raised to 60°C, followed by additional 19  $\mu$ l (12 mmol) of TFA after 10 min. After the reaction mixture was heated over 1h the solvents were removed in vacuo on cold bath, 15ml of dry toluene added to dissolve solid residue. Thereafter 12 $\mu$ l (0.15 mmol) of pyridine and 8.5  $\mu$ l (6 mmol) of TFAA were added into reaction mixture, temperature was raised to 110 °C, followed by addition of 12.5  $\mu$ l of TFAA (15 mmol) after 15 min. After 1h heating the reaction mixture was cooled to ambient temperature, evaporated to dryness and purified by column chromatography (eluent DCM/MeOH 20:1), yielding 17 mg (52%) of **3**; mp 233-235 °C;  $\lambda_{max}$ (CH<sub>3</sub>CN:H<sub>2</sub>O 95:5)/nm 407 ( $\epsilon/dm^3 \cdot mol^{-1} \cdot cm^{-1}$  45200), 504 (4745), 536 (5255), 606 (4303), 662 (20028);  $\nu_{max}/cm^{-1}$  2964, 2930 and 2871 (C-H), 1690 (C=O), 1673 (C=O), and 1161 (C-F); <sup>1</sup>H NMR (500MHz, CDCl<sub>3</sub>, 27°C)  $\delta$  9.54 (1H, s, 10-H), 9.39 (1H, s, 5-H), 9.09 (1H, s, CF<sub>3</sub>CONH), 5.14 (1H, d, <sup>2</sup>J<sub>gem</sub>=21.1 Hz, 13<sup>2</sup>-H), 5.10 (1H, d, <sup>2</sup>J<sub>gem</sub>=18.7 Hz, 13<sup>2</sup>-H), 4.54-4.12 (2H, m, 18-H and 17-H), 3.82 (2H, q, J=6.9 Hz, 3<sup>1</sup>-H), 3.71 (2H, q, J=7.5 Hz, 8<sup>1</sup>-H), 3.67 (3H, s, 12<sup>1</sup>-H), 3.48 (3H, br s, 17<sup>5</sup>-H), 3.27 (6H, br s, 2<sup>1</sup>-H and 7<sup>1</sup>-H), 2.10-2.64 (4H, m, 17<sup>1</sup>-H and 17<sup>2</sup>-H), 1.63-1.76 (6H, m, 8<sup>2</sup>-H and 3<sup>2</sup>-H), 1.54 (3H, br s, 18<sup>1</sup>-H), 0.93 (1H, br s, NH), -1.79 (1H, br s, NH); <sup>13</sup>C NMR (300MHz, CDCl<sub>3</sub>, 27°C)  $\delta$  196.1, 173.7, 170.9, 160.6, 154.1, 151.4, 148.8, 145.3, 144.5, 139.4, 139.0, 136.6, 134.9, 131.4, 129.8, 129.0, 122.6, 118.8 and 114.9 (CF<sub>3</sub>), 106.6, 105.0, 101.9, 98.4, 51.7 (17<sup>5</sup>-C, 17-C, 18-C), 48.2 and 47.8 (13<sup>2</sup>-C), 29.9 and 29.7 (17<sup>1</sup>-C, 17<sup>2</sup>-C), 21.0 (18<sup>1</sup>-C), 19.7 and 19.3 (8<sup>1</sup>-C, 3<sup>1</sup>-C), 17.6 (8<sup>2</sup>-C), 17.1 (3<sup>2</sup>-C), 14.2 (2<sup>1</sup>-C), 12.3 (12<sup>1</sup>-C), 11.4 (7<sup>1</sup>-C); HRMS: 661.2889 (calc. for C<sub>36</sub>H<sub>38</sub>F<sub>3</sub>N<sub>5</sub>O<sub>4</sub> 661.2876).

**20-(trifluoroacetamide)-mesopyropheorbide a aza-18-crown-6-amide (4).**

34.9 mg (0.053 mmol) of **3** was dissolved in 30% HCl (10 ml) and mixture was stirred for 3 h under argon in darkness. Afterward the reaction mixture was transferred to separating funnel

and DCM was added for extraction. pH of the mixture was adjusted to 5 by treatment with NaOH and NaHCO<sub>3</sub>. Thereafter organic layer was washed with brine and then separated, solvent was evaporated and column chromatography (silica, CH<sub>2</sub>Cl<sub>2</sub>/MeOH 10:1) was done to obtain 34.0 mg of dark solid compound (hydrolyzed methyl ester). Thus obtained acid was freshly without characterization dissolved with 18-aza-crown-6 (13.8 mg, 0.053 mmol) in 35 ml of dry DCM. After that EDC (11.2 mg, 0.058 mmol) was added and RM was stirred under Ar atmosphere at RT for 3 h. After full conversion of starting product (TLC control) mixture was additionally diluted by DCM, transferred into separating funnel and washed with water. Organic phase was separated, solvent was evaporated and column chromatography (silica, DCM/MeOH 10:1) was done to obtain 40.2 mg (72.8 %) of pure product; mp 143-145 °C  $\lambda_{\max}$ (DMF:H<sub>2</sub>O 92:8)/nm 410 ( $\epsilon/\text{dm}^3 \cdot \text{mol}^{-1} \cdot \text{cm}^{-1}$  111802), 507 (9814), 538 (11977), 609 (9256), 665 (49477);  $\nu_{\max}/\text{cm}^{-1}$  2963, 2930 and 2869 (C-H), 1734 (C=O), 1696 (C=O), 1614 (C=O) and 1125 (C-F); <sup>1</sup>H NMR (500 MHz, DMF-d<sub>7</sub>, 27 °C)  $\delta$  12.66 (1H, CF<sub>3</sub>CONH), 9.91 (1H, s), 9.64 (1H, s), 5.38 (1H, d, *J*=19.6 Hz), 5.28 (1H, d, *J*=19.6 Hz), 4.50 (1H, m), 4.42 (1H, m), 4.03 (2H, q, *J*=7.5 Hz), 3.75 (2H, q, *J*=7.5 Hz), 3.68 (3H, s), 3.43 (3H, s), 3.38-2.33 (29H, m), 1.99 (2H, m), 1.74 (3H, t, *J*=7.5 Hz), 1.70-1.62 (6H, m), 0.92 (1H, N-H), -1.83 (1H, N-H); <sup>13</sup>C NMR (500 MHz, DMF-d<sub>7</sub>, 27°C)  $\delta$  195.6, 172.7, 171.9, 161.9, 158.7 (CF<sub>3</sub>C=O, *J*=36.8 Hz), 154.0, 151.6, 148.3, 145.5, 144.6, 139.3, 138.9, 136.9, 134.9, 131.5, 130.3, 129.5, 117.6 (CF<sub>3</sub>), 107.6, 105.3, 105.3, 104.1, 98.2, 70.2 (7C), 69.3, 69.0, 68.6, 51.9, 48.7, 48.5, 48.2, 46.5, 30.3, 28.2, 20.9, 19.1, 19.0, 17.4, 17.1, 13.8, 10.7; ESI-MS (M<sup>+</sup>) 893.4402 (calc. for C<sub>47</sub>H<sub>60</sub>F<sub>3</sub>N<sub>6</sub>O<sub>8</sub> 893.4419).

## UV-vis spectra

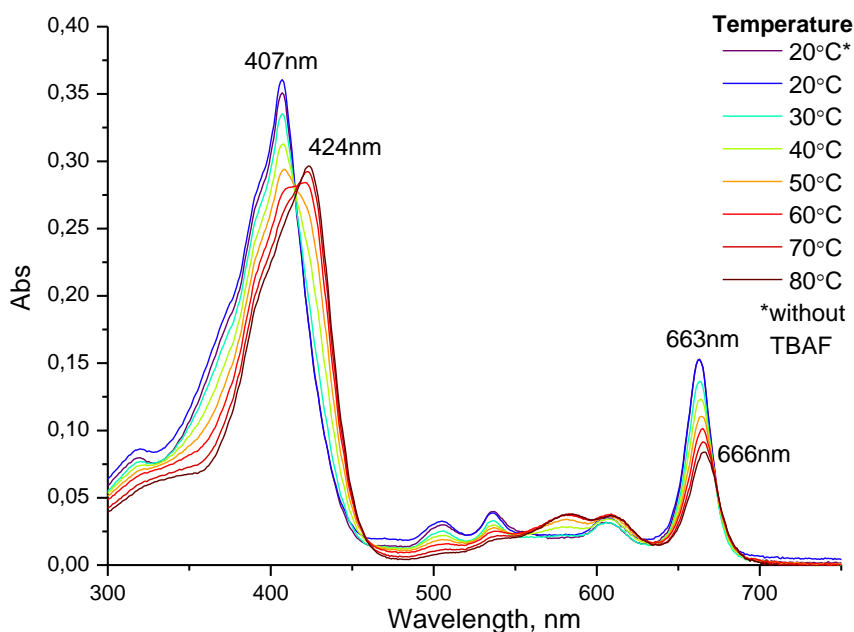

Fig. S1. Variable temperature measurements of **3** in MeCN:H<sub>2</sub>O (95:5) with 150 eq. of TBAF ( $1.45 \cdot 10^{-5}$  M).

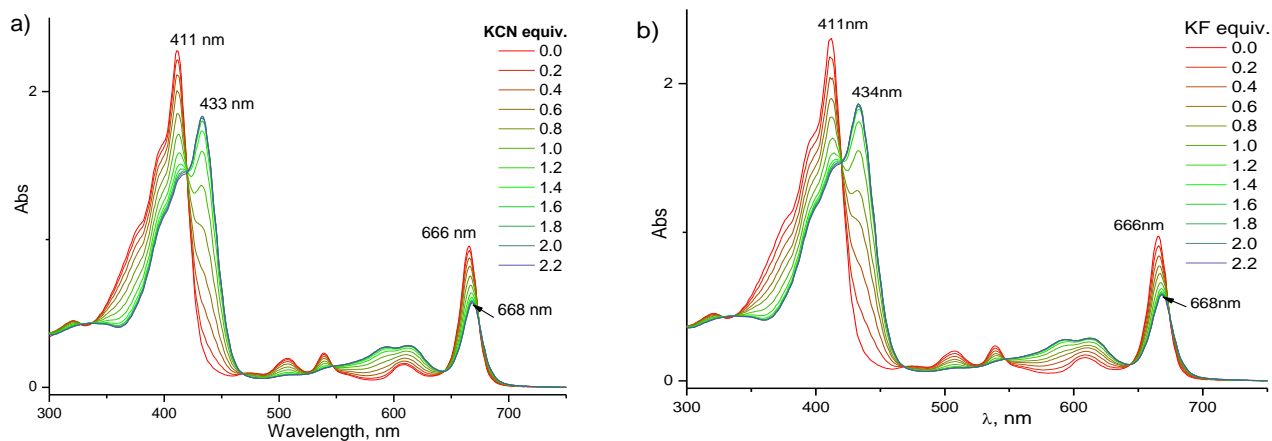

Fig. S2. The titration of **4** a) with KCN and b) with KF in DMSO:H<sub>2</sub>O (95:5) ( $2.466 \cdot 10^{-5}$  M).

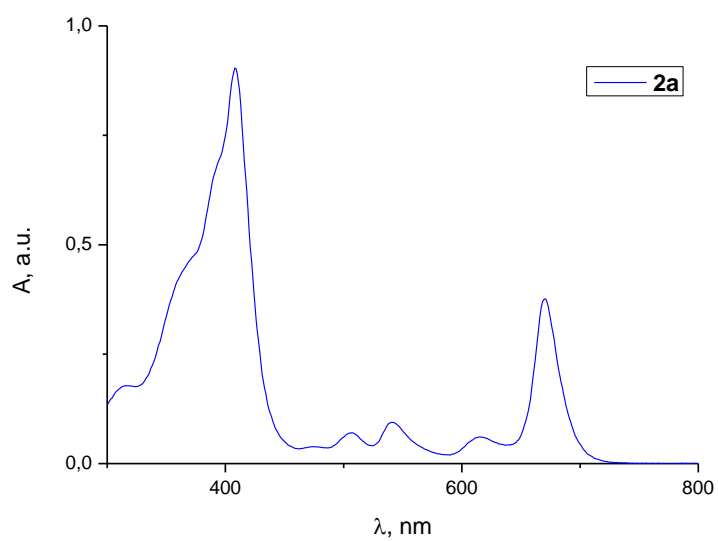

UV-vis characterization of **2a** in DCM ( $1.208 \cdot 10^{-5}$  M)

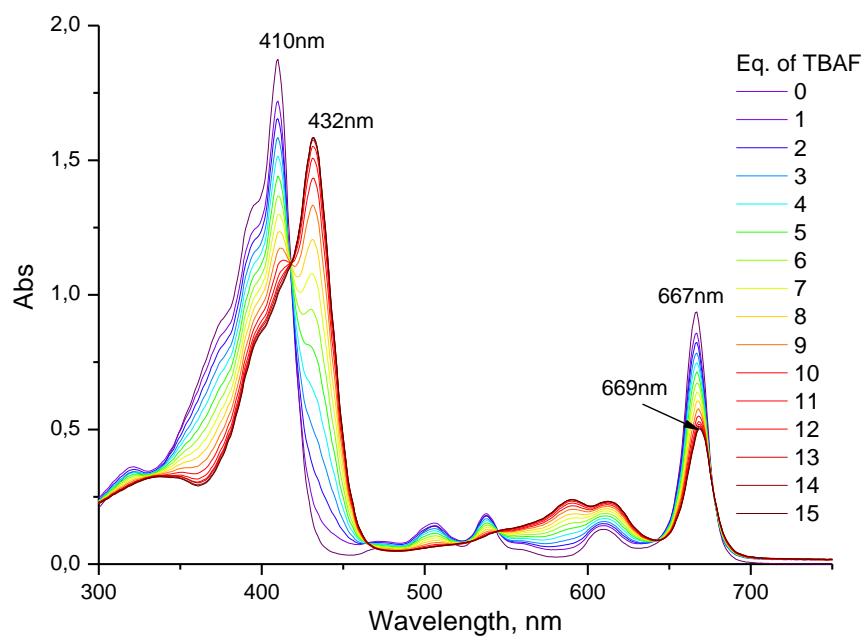

Titration of **3** by TBAF in  $\text{CHCl}_3$  ( $1.45 \cdot 10^{-5}$  M)

The following 18 spectra related to Fig. 4a in the main body text:

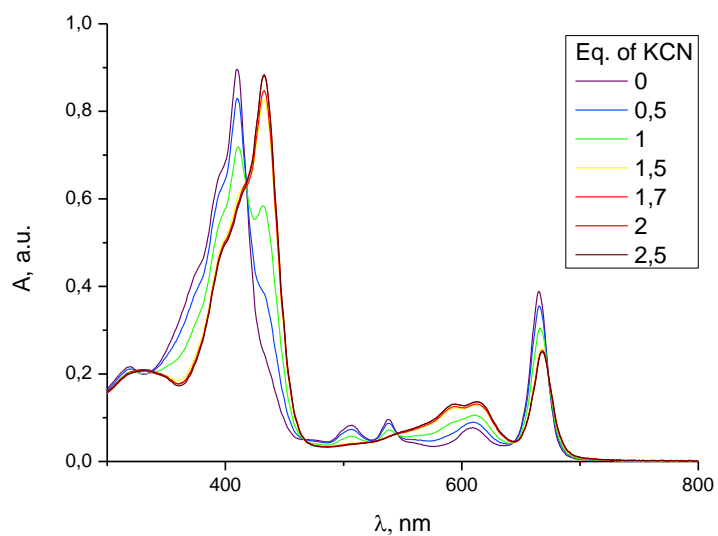

Titration of **4** by KCN in DMF:H<sub>2</sub>O 99:1 system ( $8.6 \cdot 10^{-6}$  M)

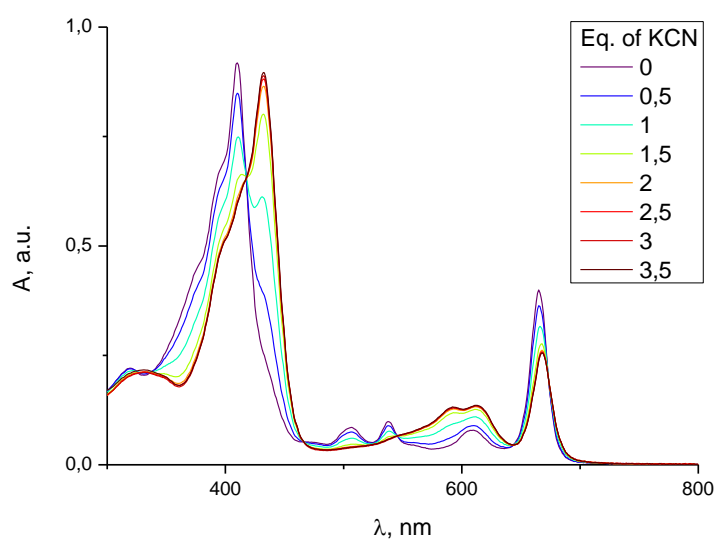

Titration of **4** by KCN in DMF:H<sub>2</sub>O 98:2 system ( $8.6 \cdot 10^{-6}$  M)



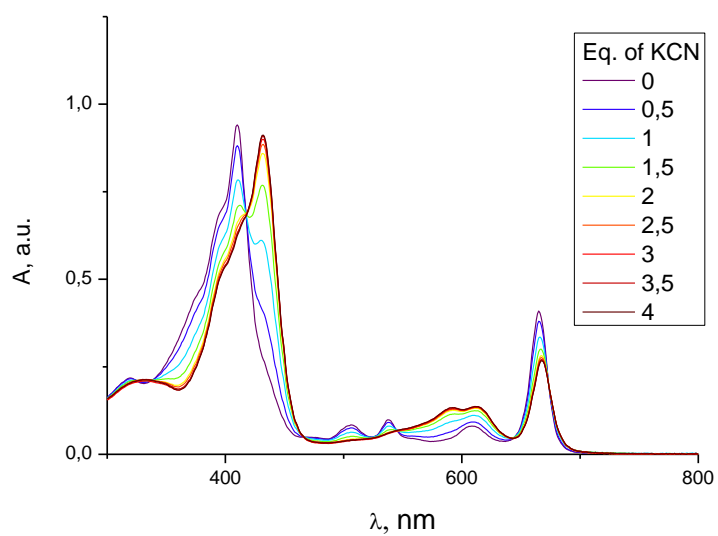

Titration of **4** by KCN in DMF:H<sub>2</sub>O 97:3 system ( $8.6 \cdot 10^{-6}$  M)

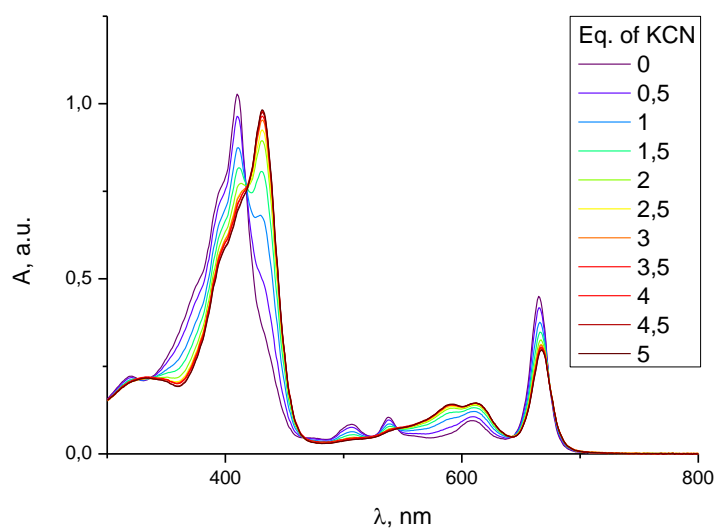

Titration of **4** by KCN in DMF:H<sub>2</sub>O 96:4 system ( $8.6 \cdot 10^{-6}$  M)

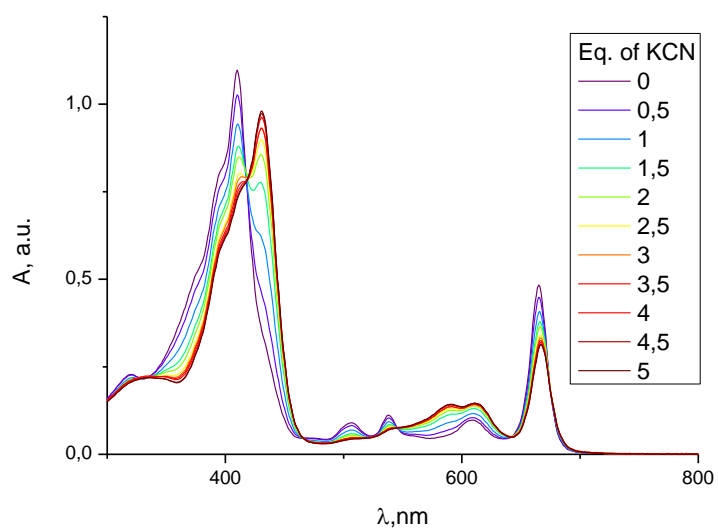

Titration of **4** by KCN in DMF:H<sub>2</sub>O 95:5 system ( $8.6 \cdot 10^{-6}$  M)

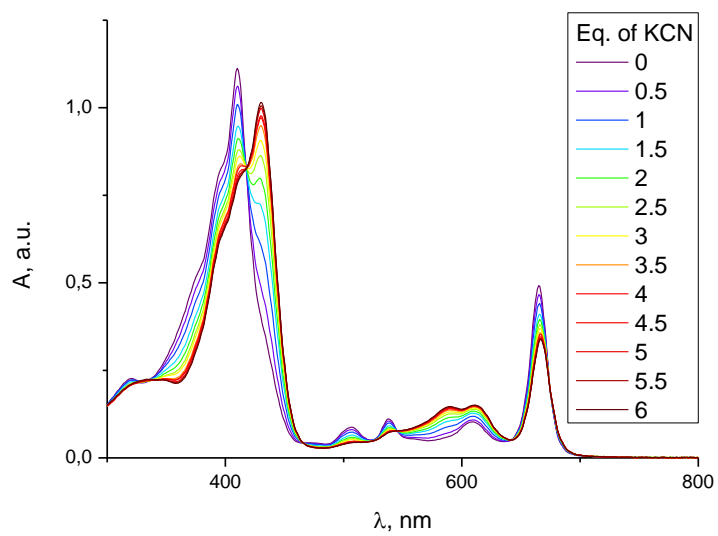

Titration of **4** by KCN in DMF:H<sub>2</sub>O 94:6 system ( $8.6 \cdot 10^{-6}$  M)

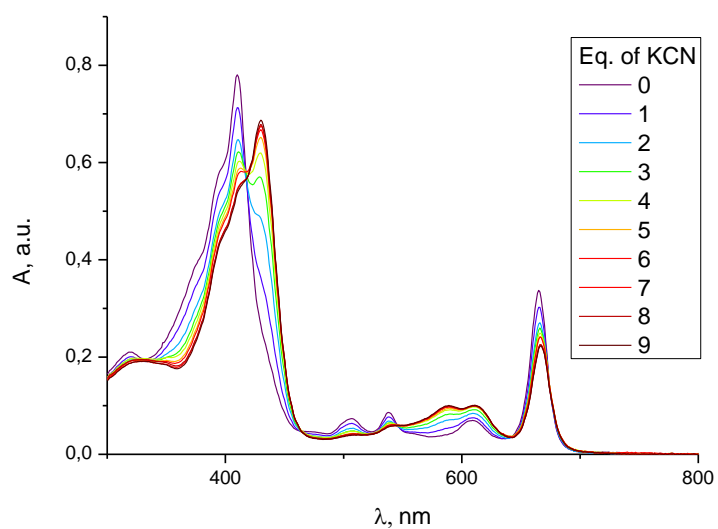

Titration of **4** by KCN in DMF:H<sub>2</sub>O 93:7 system ( $8.6 \cdot 10^{-6}$  M)

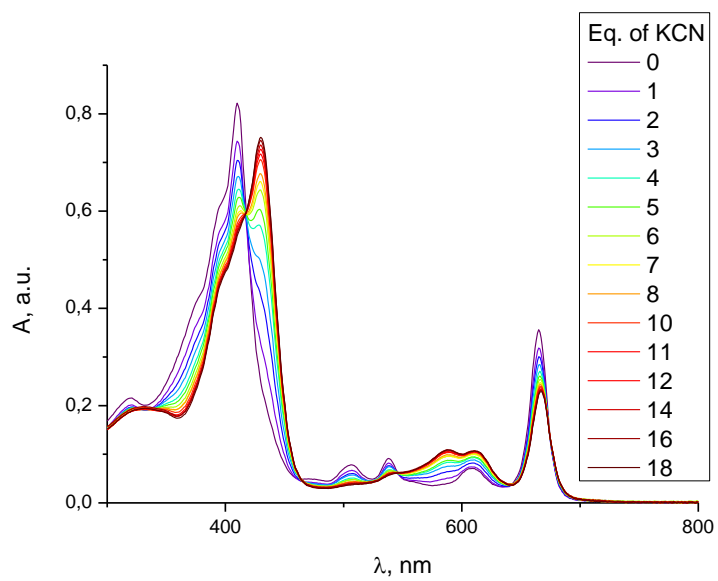

Titration of **4** by KCN in DMF:H<sub>2</sub>O 92:8 system ( $8.6 \cdot 10^{-6}$  M)

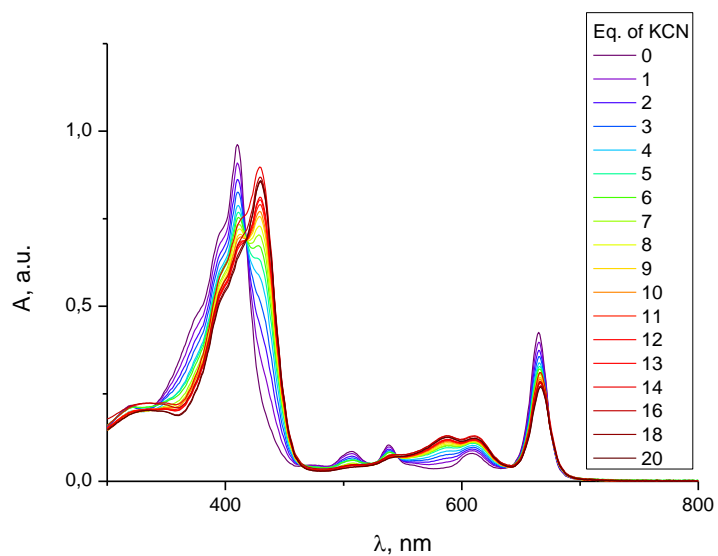

Titration of **4** by KCN in DMF:H<sub>2</sub>O 91:9 system ( $8.6 \cdot 10^{-6}$  M)

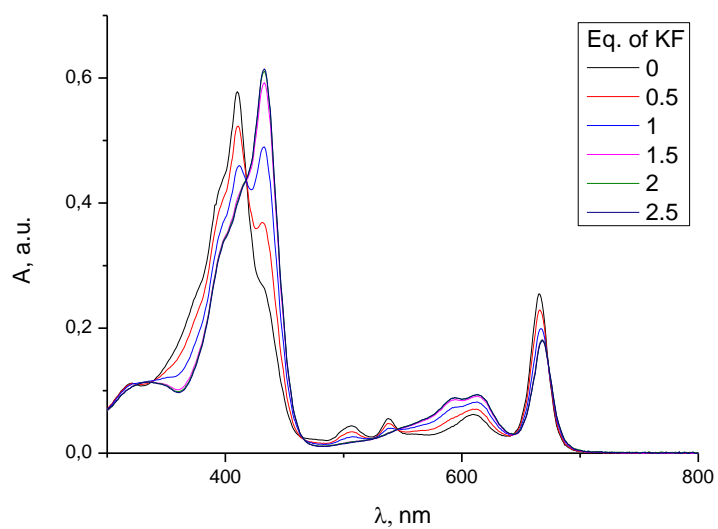

Titration of **4** by KF in DMF:H<sub>2</sub>O 99:1 system ( $8.6 \cdot 10^{-6}$  M)

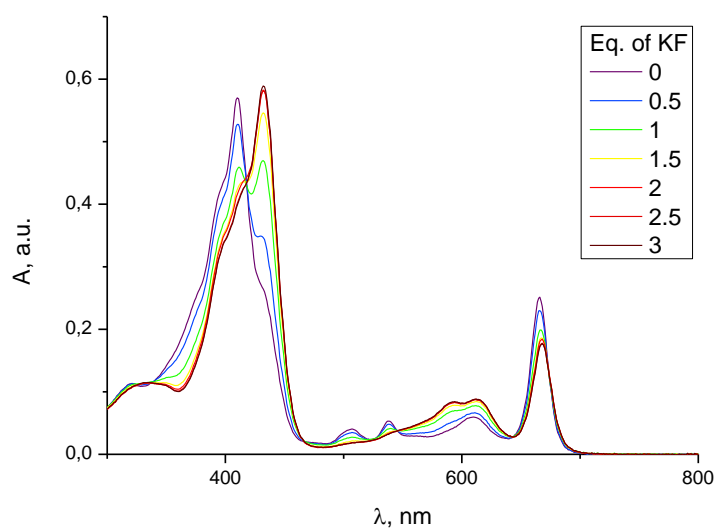

Titration of **4** by KF in DMF:H<sub>2</sub>O 98:2 system ( $8.6 \cdot 10^{-6}$  M)

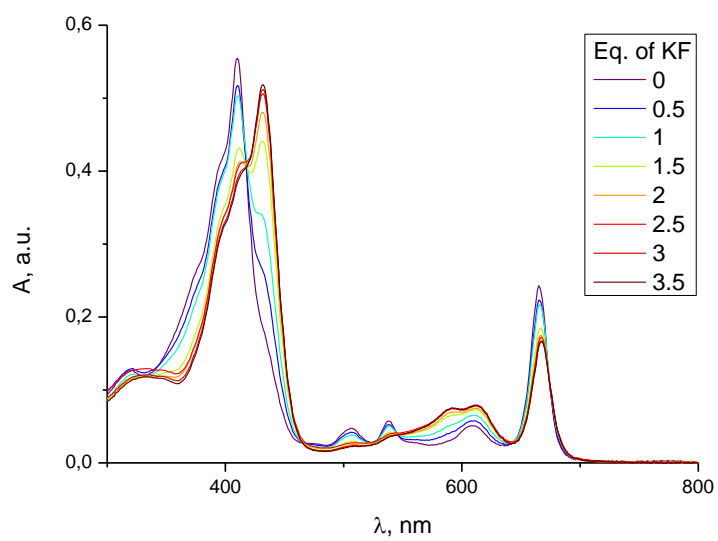

Titration of **4** by KF in DMF:H<sub>2</sub>O 97:3 system ( $8.6 \cdot 10^{-6}$  M)

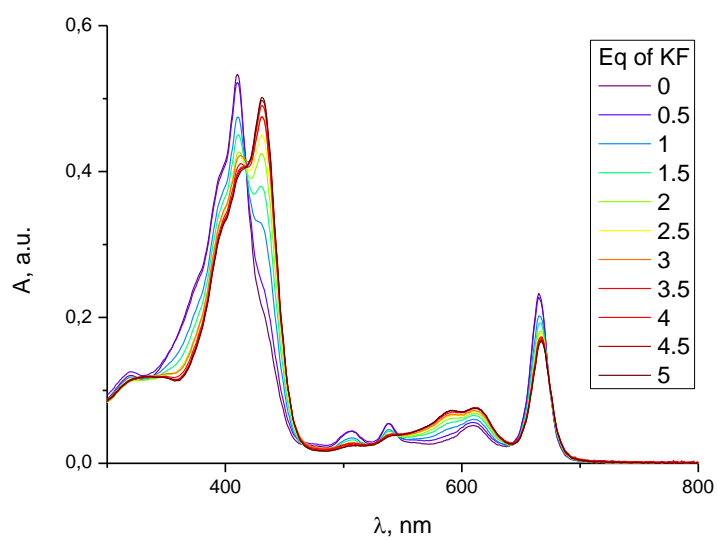

Titration of **4** by KF in DMF:H<sub>2</sub>O 96:4 system ( $8.6 \cdot 10^{-6}$  M)

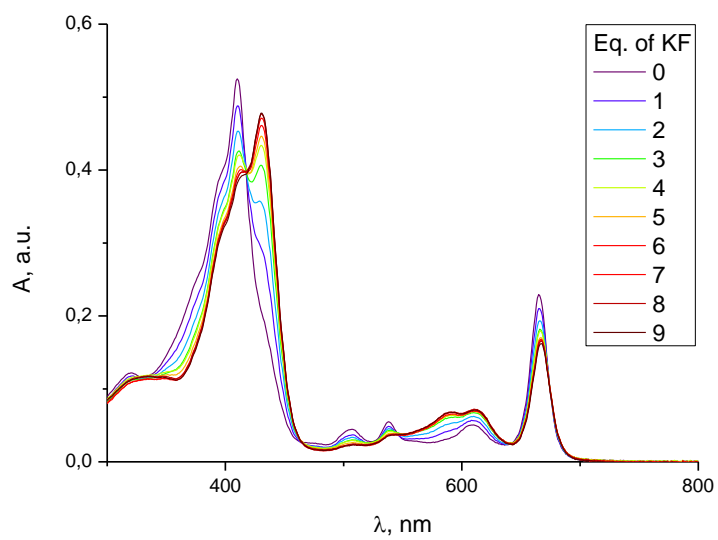

Titration of **4** by KF in DMF:H<sub>2</sub>O 95:5 system ( $8.6 \cdot 10^{-6}$  M)

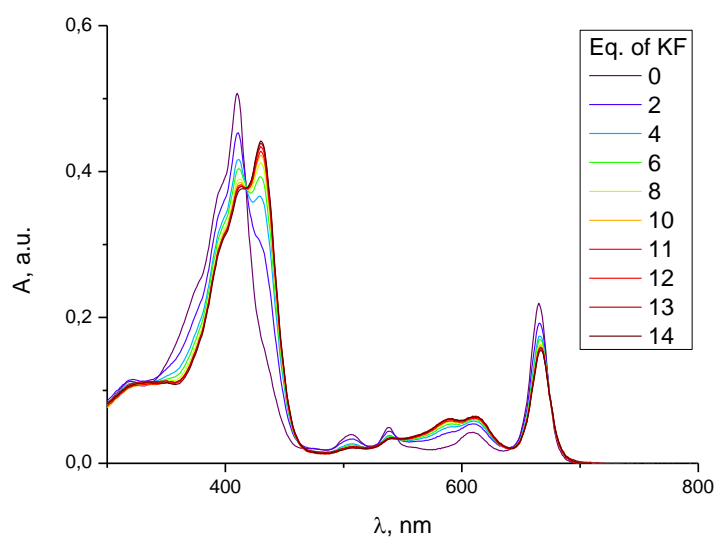

Titration of **4** by KF in DMF:H<sub>2</sub>O 94:6 system ( $8.6 \cdot 10^{-6}$  M)

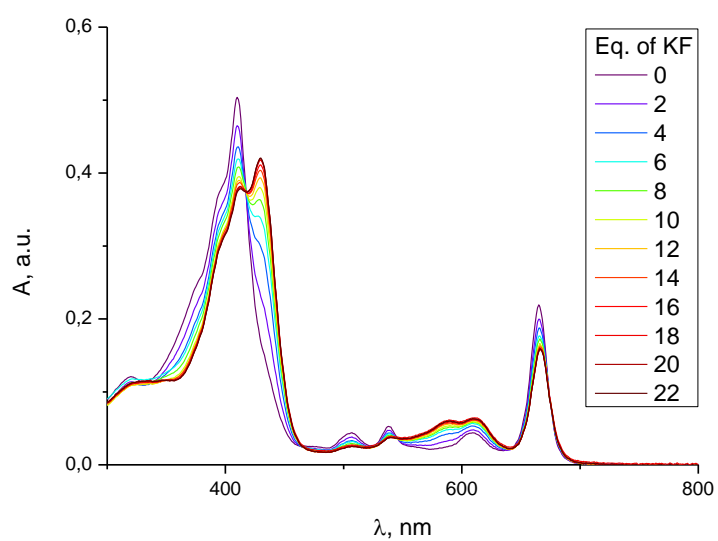

Titration of **4** by KF in DMF:H<sub>2</sub>O 93:7 system ( $8.6 \cdot 10^{-6}$  M)

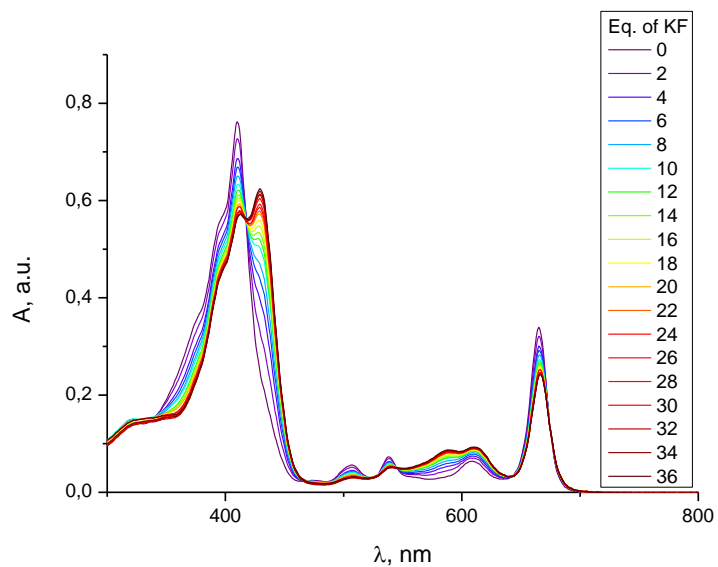

Titration of **4** by KF in DMF:H<sub>2</sub>O 92:8 system ( $8.6 \cdot 10^{-6}$  M)

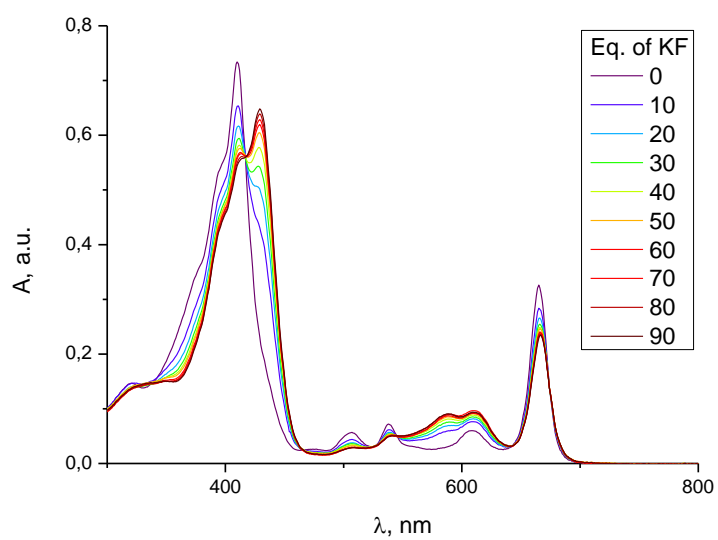

Titration of **4** by KF in DMF:H<sub>2</sub>O 91:9 system ( $8.6 \cdot 10^{-6}$  M)



The following spectra related to Fig. 4b in main body:

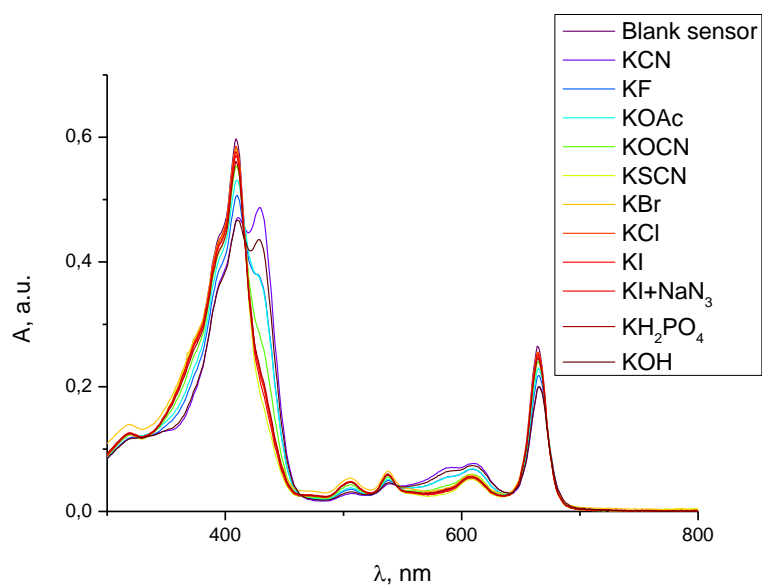

Titration of **4** by 2.5 eq. excess of various anions in DMF:H<sub>2</sub>O 94:6 system ( $8.6 \cdot 10^{-6}$  M)

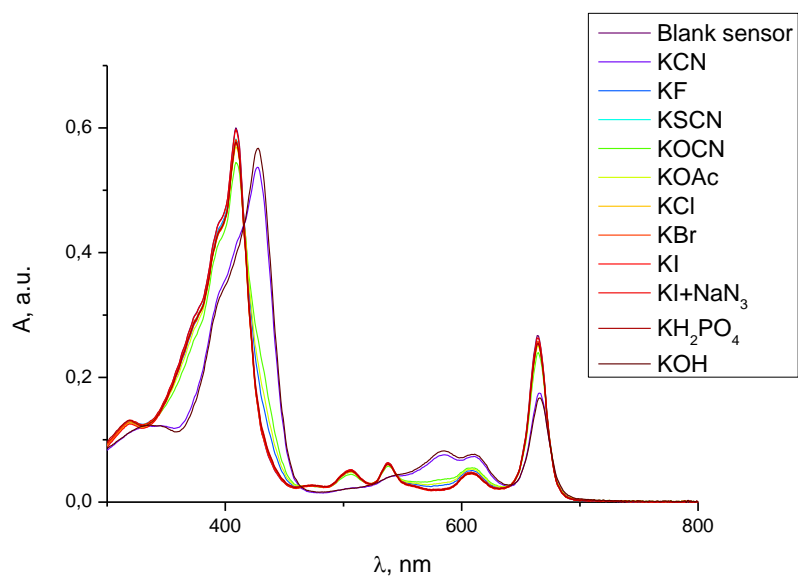

Titration of **4** by 25 eq. excess of various anions in DMF:H<sub>2</sub>O 75:15 system ( $8.6 \cdot 10^{-6}$  M)

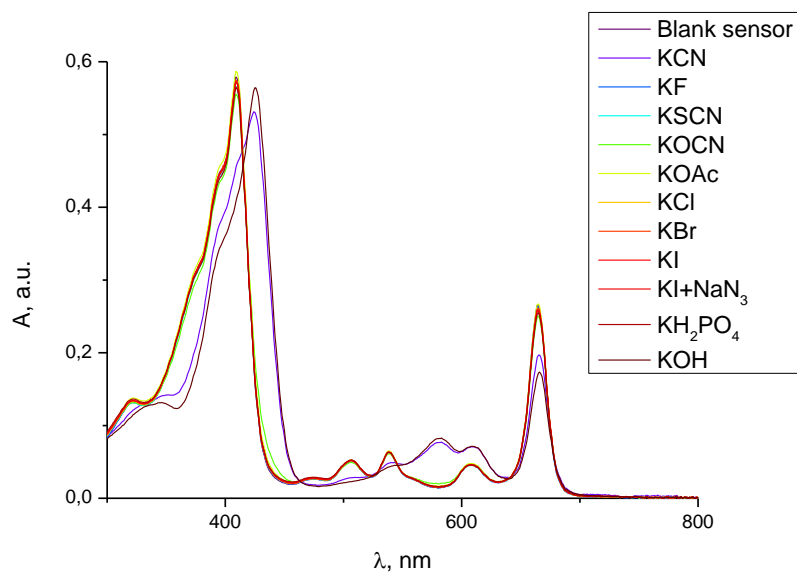

Titration of **4** by 40 eq. excess of various anions in DMF:H<sub>2</sub>O 70:30 system ( $8.6 \cdot 10^{-6}$  M)

## Buffer titrations

### DMF/H<sub>2</sub>O 1:1 system (with an excess of water)

C(sensor) =  $8.6 \cdot 10^{-6}$  M; 1000 eq. of KH<sub>2</sub>PO<sub>4</sub>, 1000 eq. of K<sub>2</sub>HPO<sub>4</sub>.

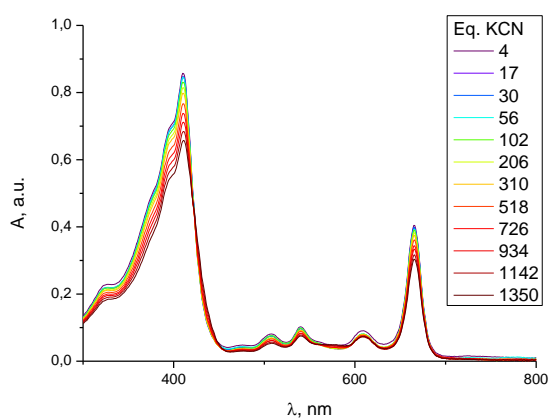

Titration with KCN

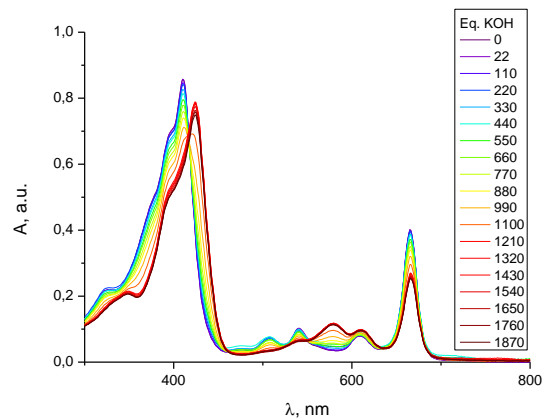

Titration with KOH.

Response from KCN was very weak due to strong due to the *buffer* influence. Complete change with KOH takes 1200 equiv (buffer capacity), while addition of same amount of KCN causes only dilution effect.

Monitoring KOH titration absorbance at  $\lambda_{\max}=424$  nm below reveals buffering capacity and dilution effect.

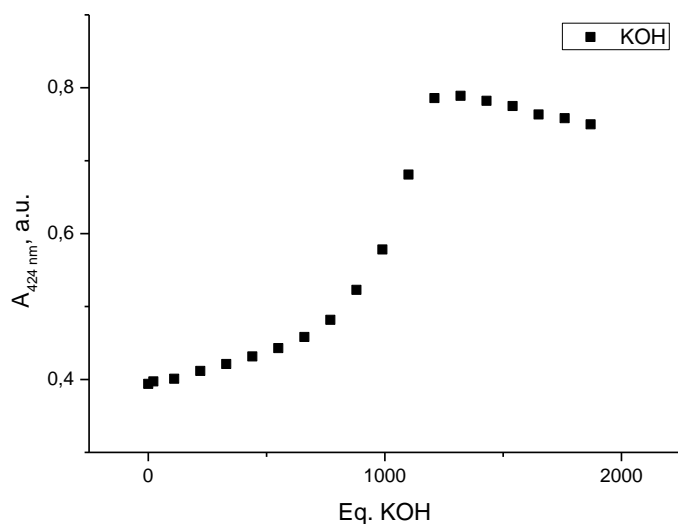

### **BUFFER TITRATIONS WITH CONSTANT H<sub>2</sub>O AMOUNT.**

Following three titrations below were performed with constant amount of H<sub>2</sub>O (2%).

#### **DMF:H<sub>2</sub>O 98:2**

100 eq. Na<sub>2</sub>HPO<sub>4</sub>, 100 eq. NaH<sub>2</sub>PO<sub>4</sub>; C(sensor)= $8.96 \times 10^{-6}$  M

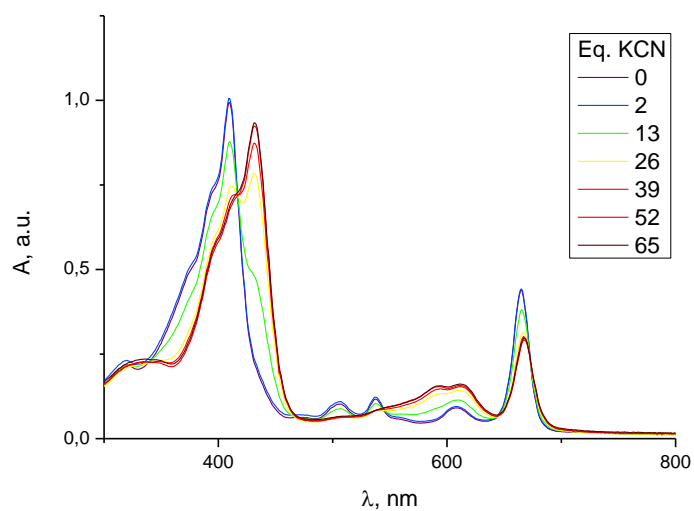

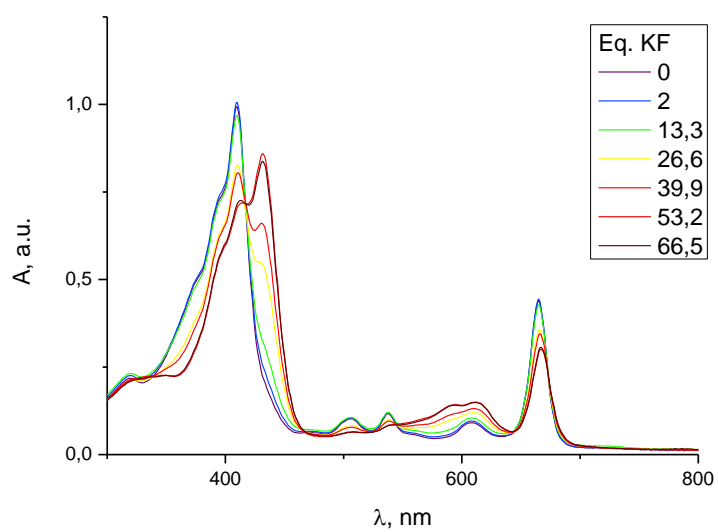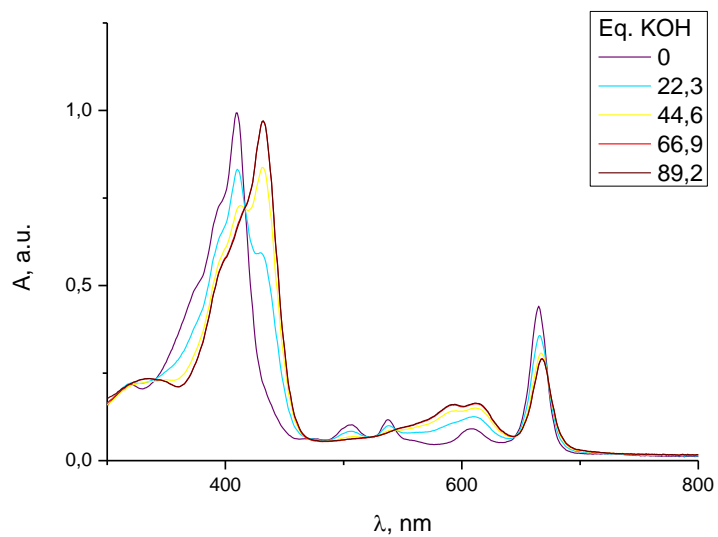

A comparison of the three titrations indicates that for an addition of ~20 equiv. of KCN causes such spectral changes for which twice as much i.e. ~40 equiv. of KF and KOH are needed.

## NMR spectra

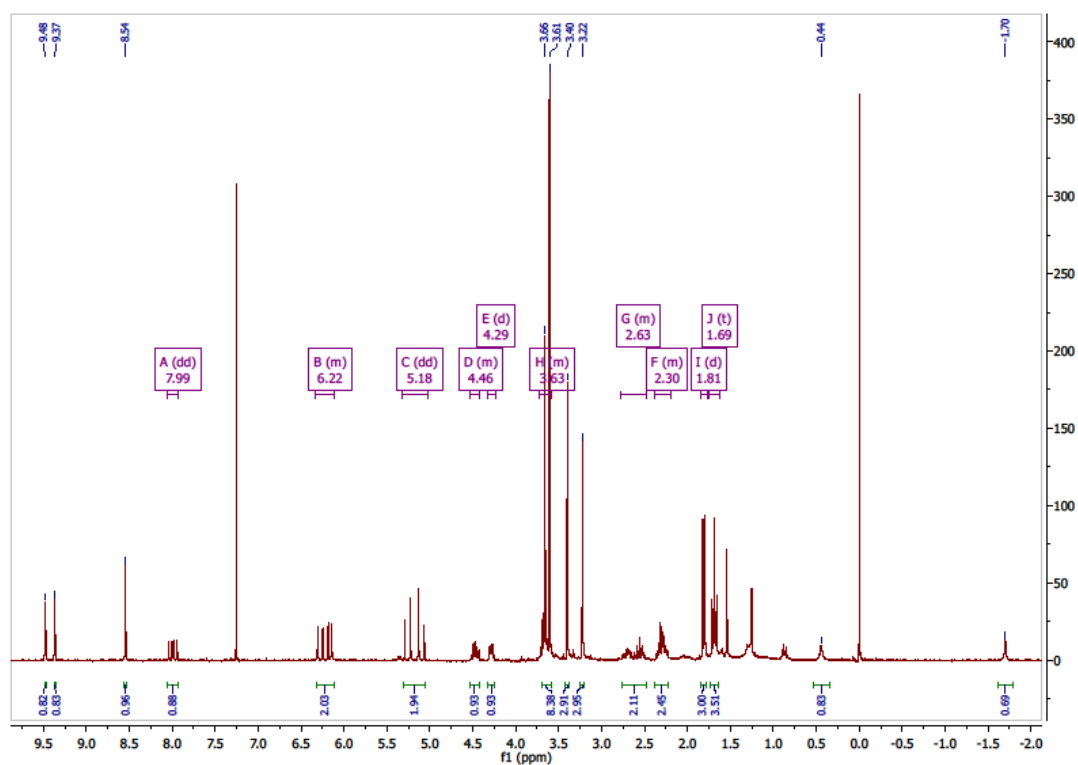

Pyropheophorbide *a* methyl ester (**1b**)  $^1\text{H}$  NMR

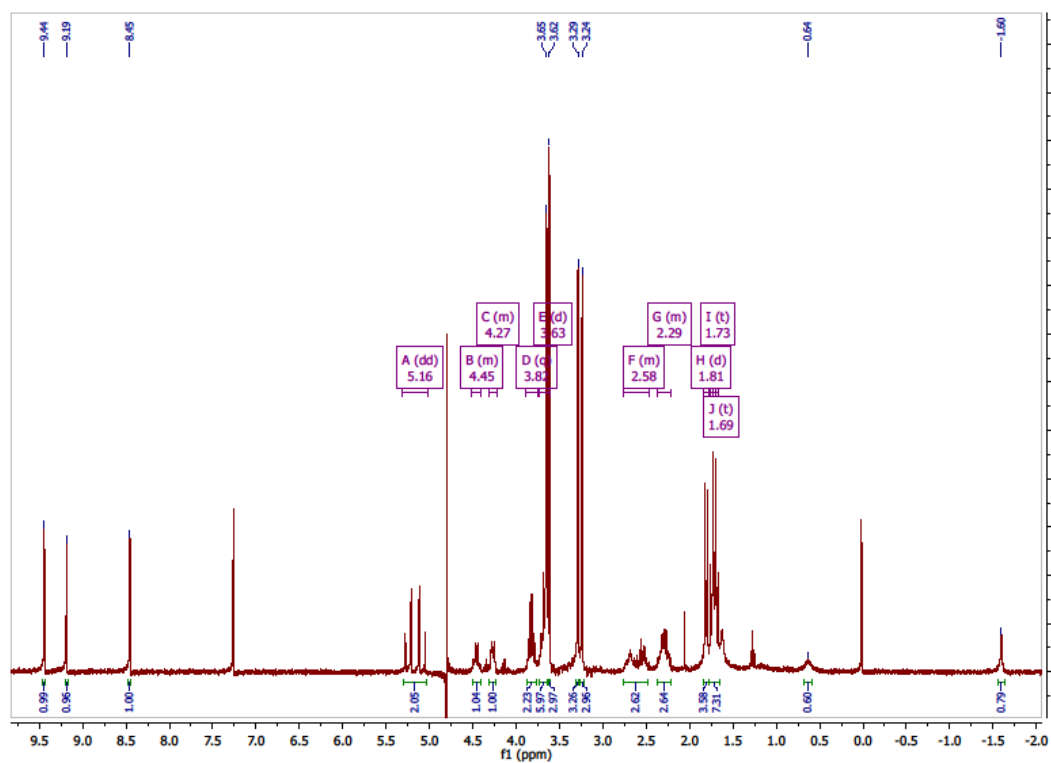

Mesopyropheophorbide *a* methyl ester (**1a**)  $^1\text{H}$  NMR

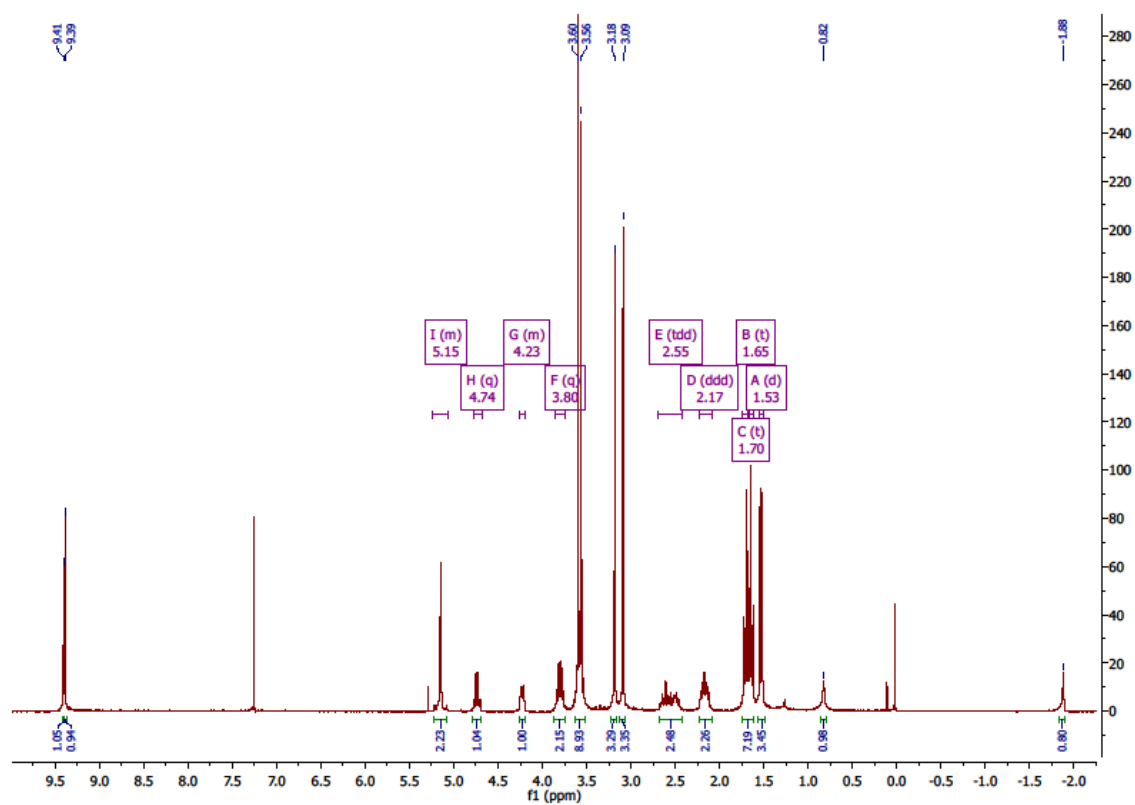

20-nitro-mesopyropheophorbide *a* methyl ester (**2a**) <sup>1</sup>H NMR

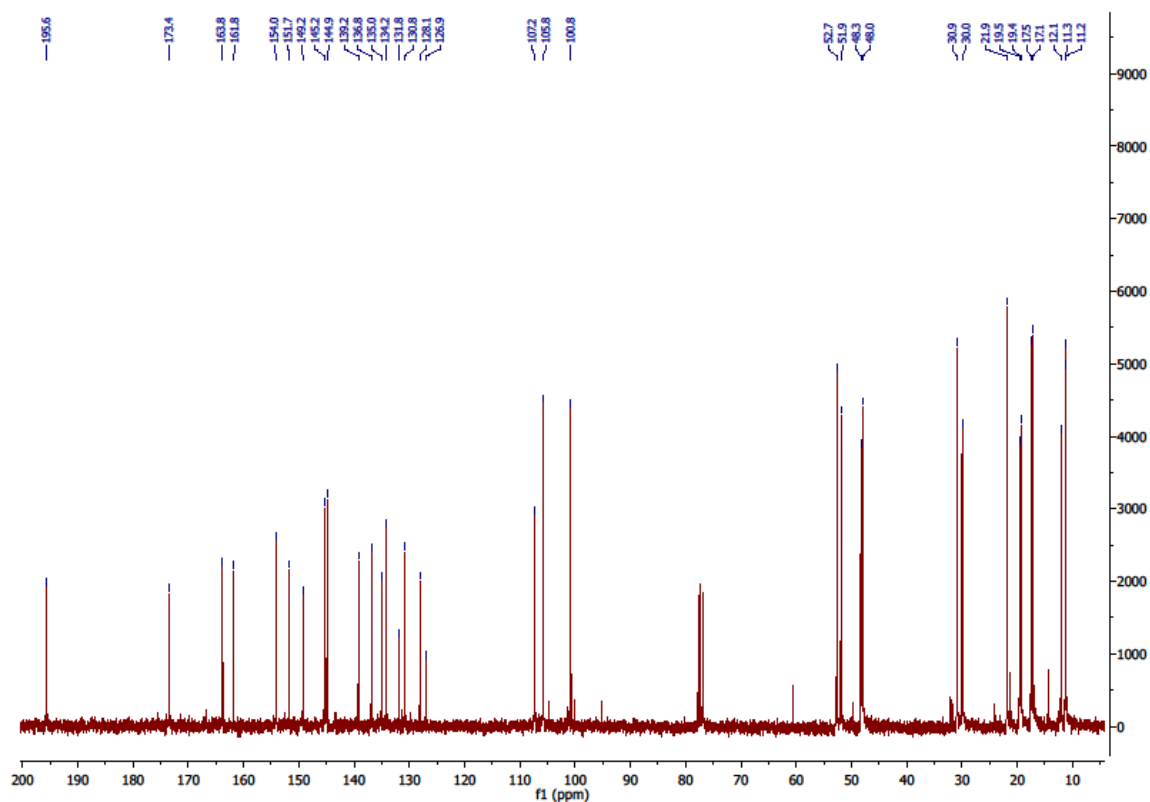

20-nitro-mesopyropheophorbide *a* methyl ester (**2a**) <sup>13</sup>C NMR

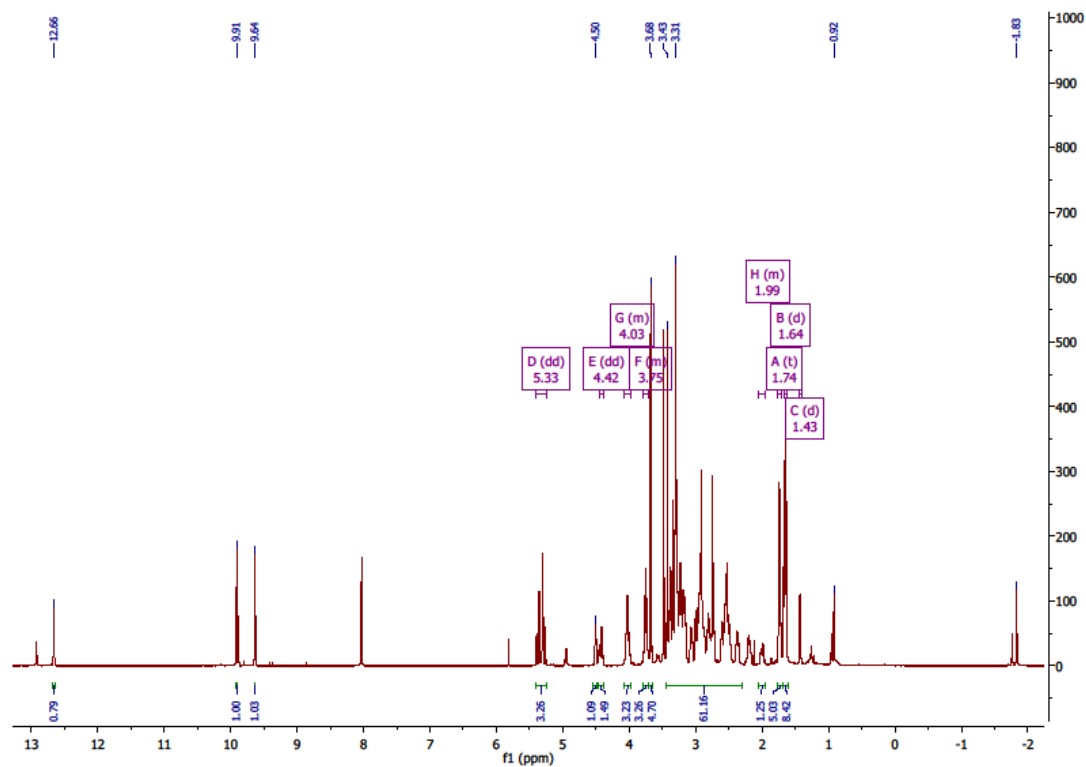

20-(trifluoroacetamide)-mesopyropheophorbide *a* aza-18-crown-6-amide (**4**)  $^1\text{H}$  NMR

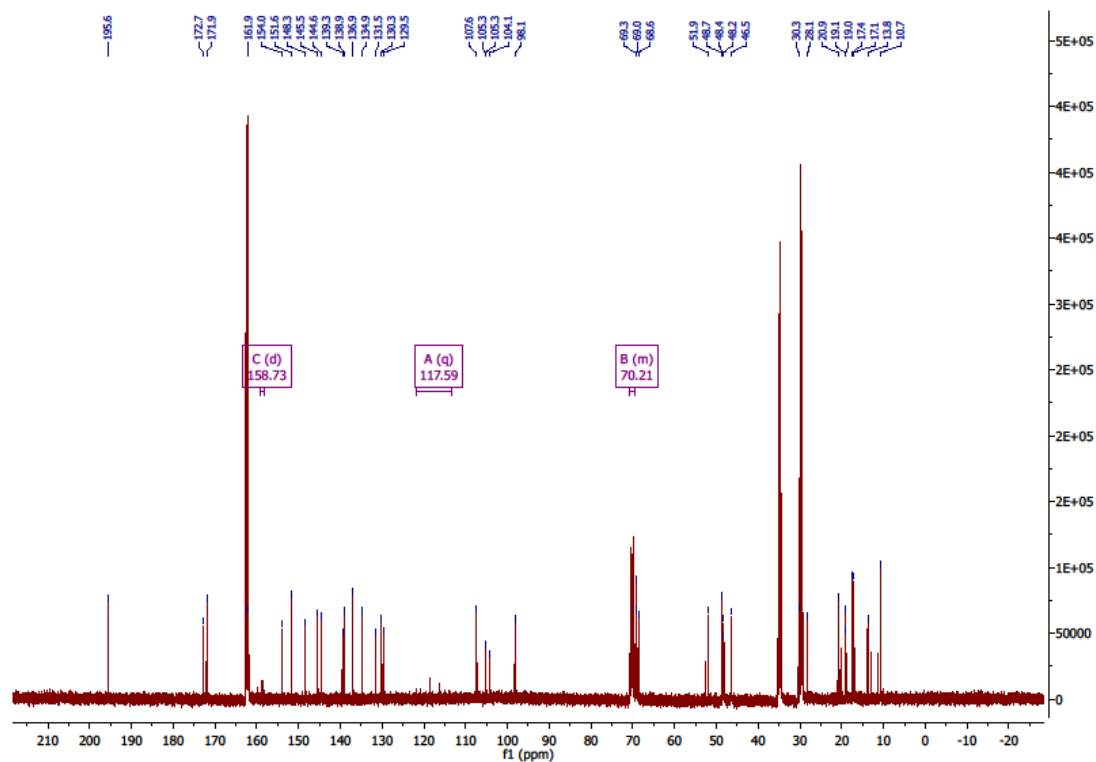

20-(trifluoroacetamide)-mesopyropheophorbide *a* aza-18-crown-6-amide (**4**)  $^{13}\text{C}$  NMR

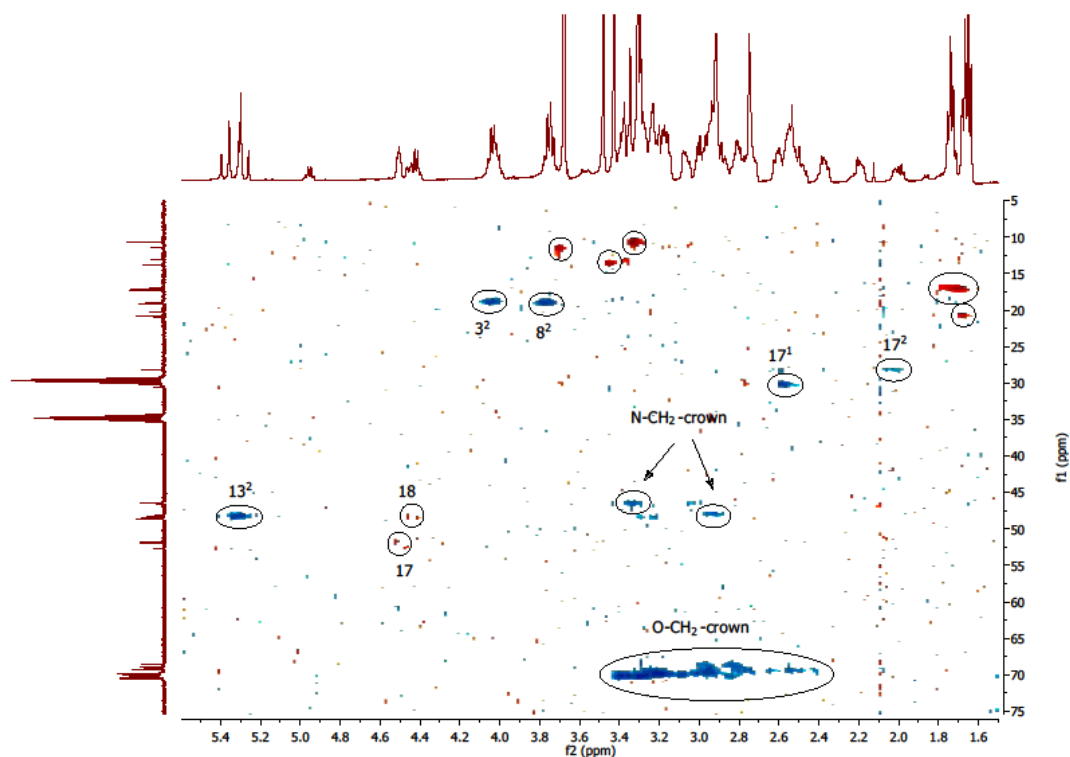

20-(trifluoroacetamide)-mesopyropheophorbide *a* aza-18-crown-6-amide (**4**)  $^1\text{H}$ - $^{13}\text{C}$  HSQC  
(Multiplicity edit: blue contours –  $\text{CH}_2$ , red contours –  $\text{CH}$  and  $\text{CH}_3$ )

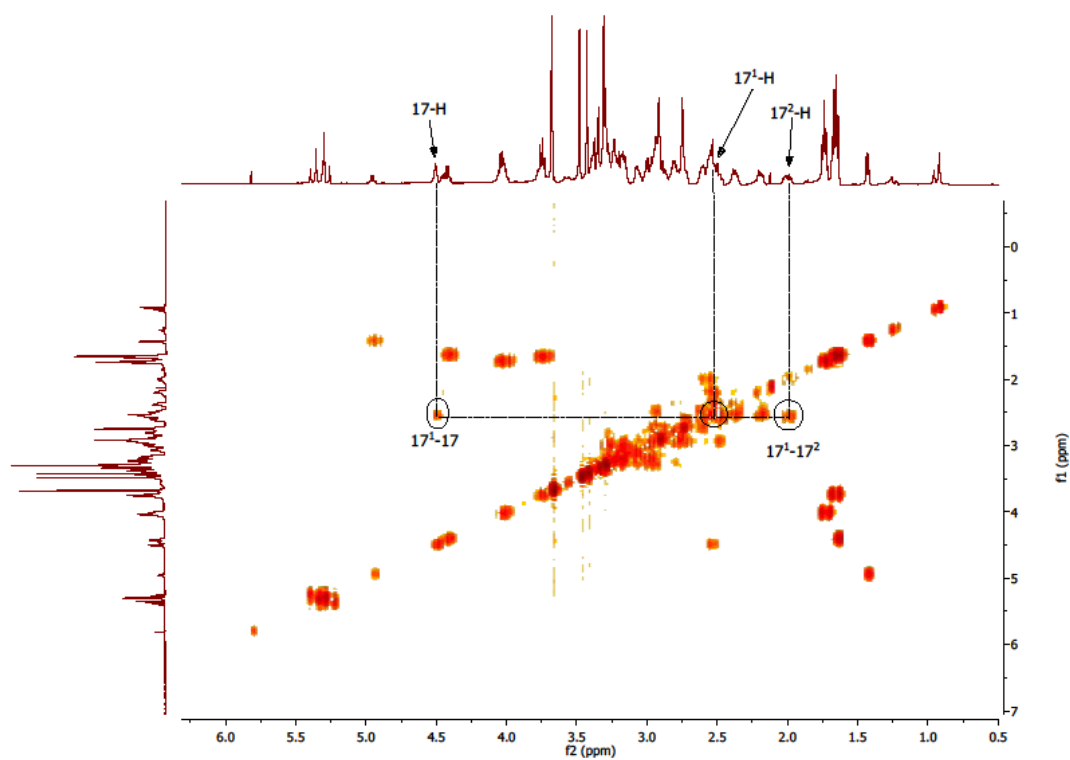

20-(trifluoroacetamide)-mesopyropheophorbide *a* aza-18-crown-6-amide (**4**)  $^1\text{H}$ - $^1\text{H}$  COSY



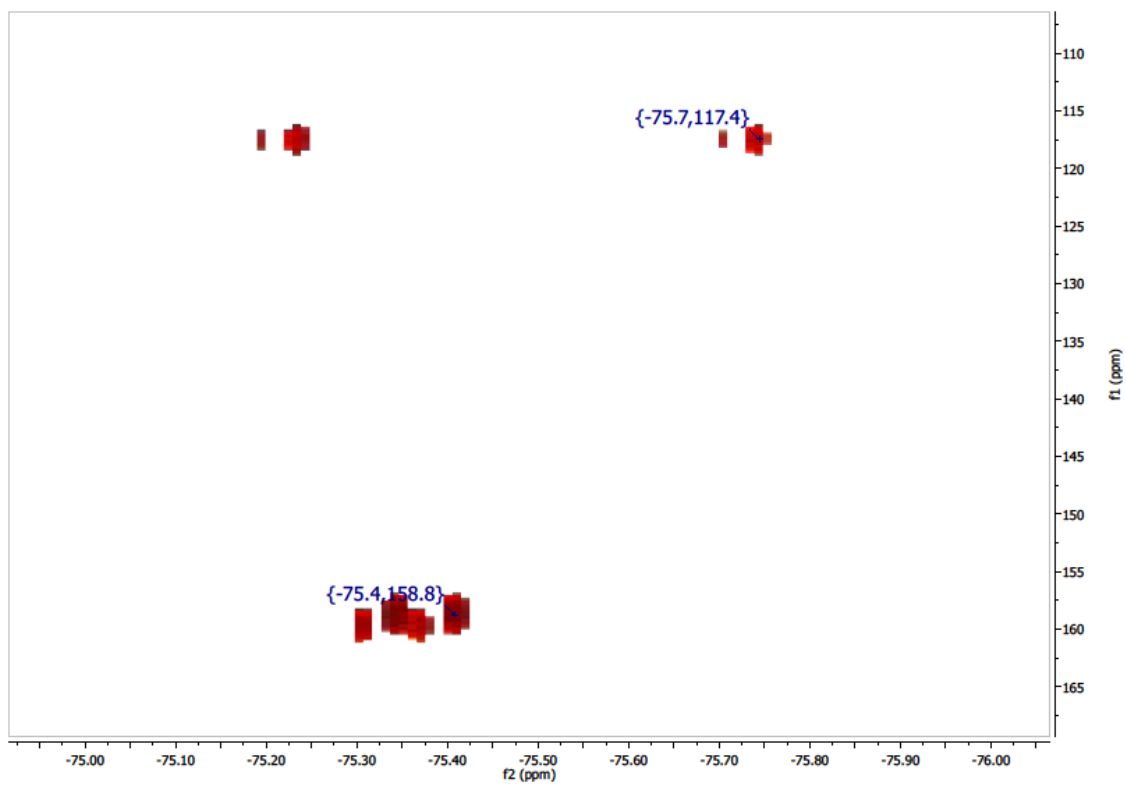

$^{19}\text{F}$ - $^{13}\text{C}$  HMBC of **4**

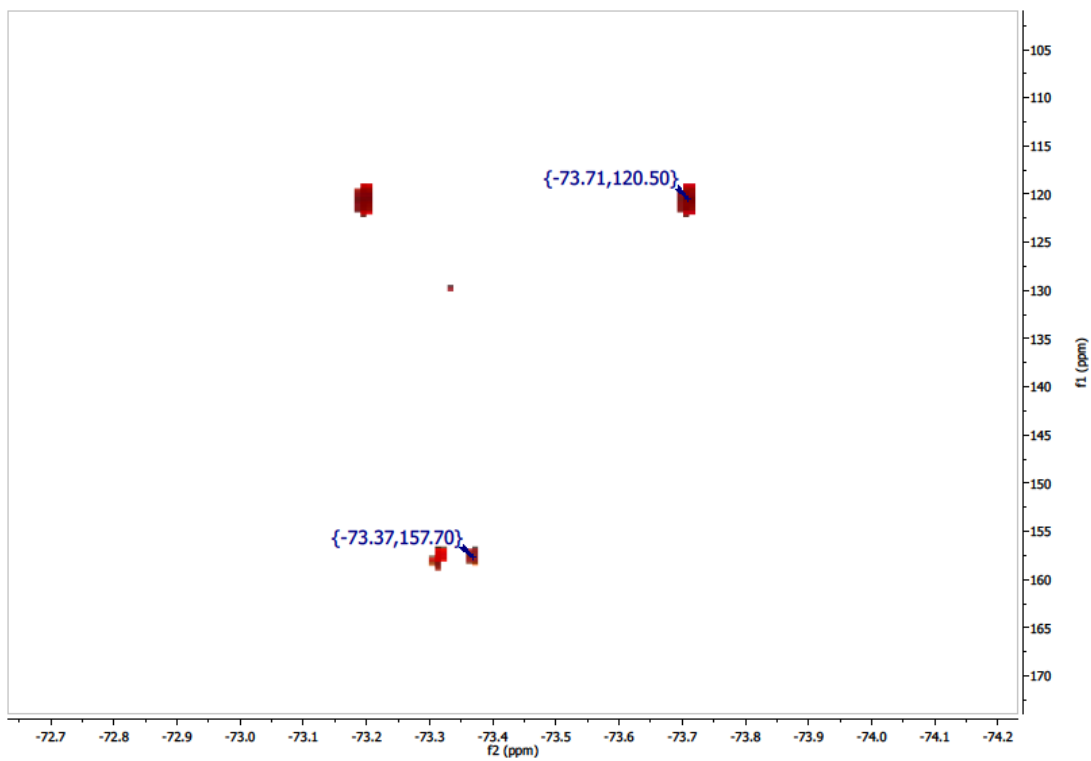

$^{19}\text{F}$ - $^{13}\text{C}$  HMBC of **4** with 3 equiv. of added KF

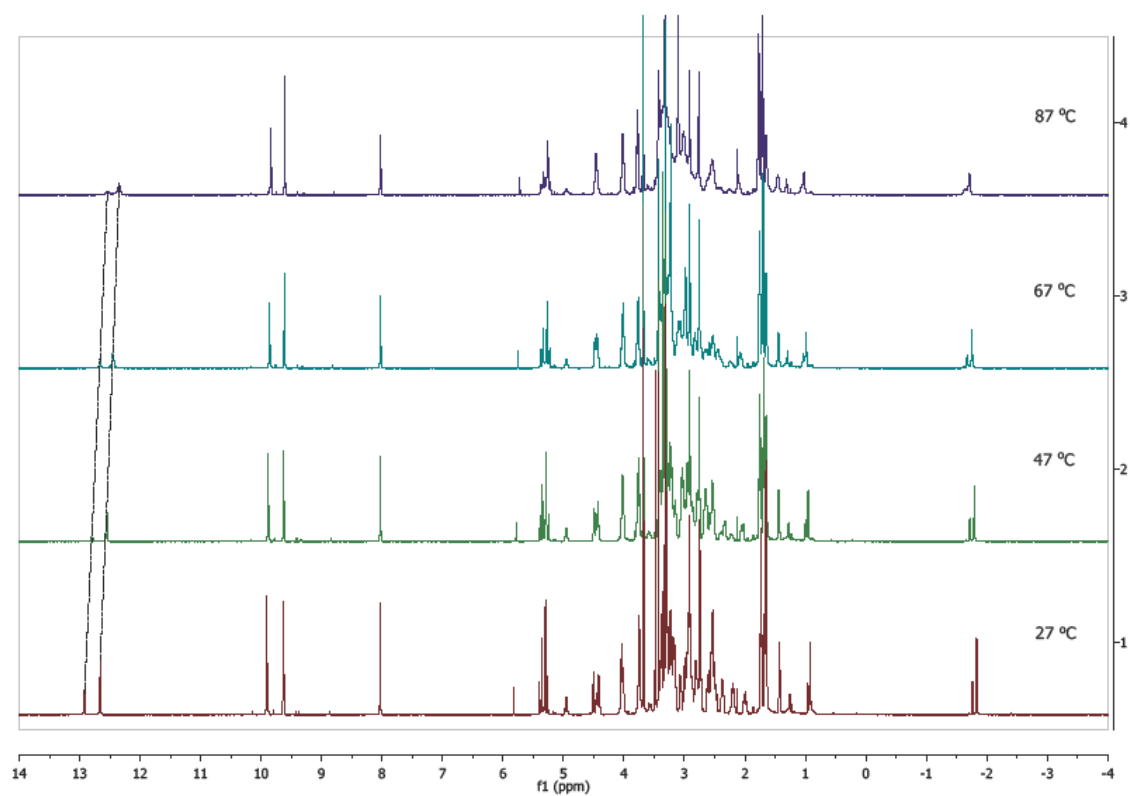

Variable temperature of <sup>1</sup>H NMR spectra of **4**

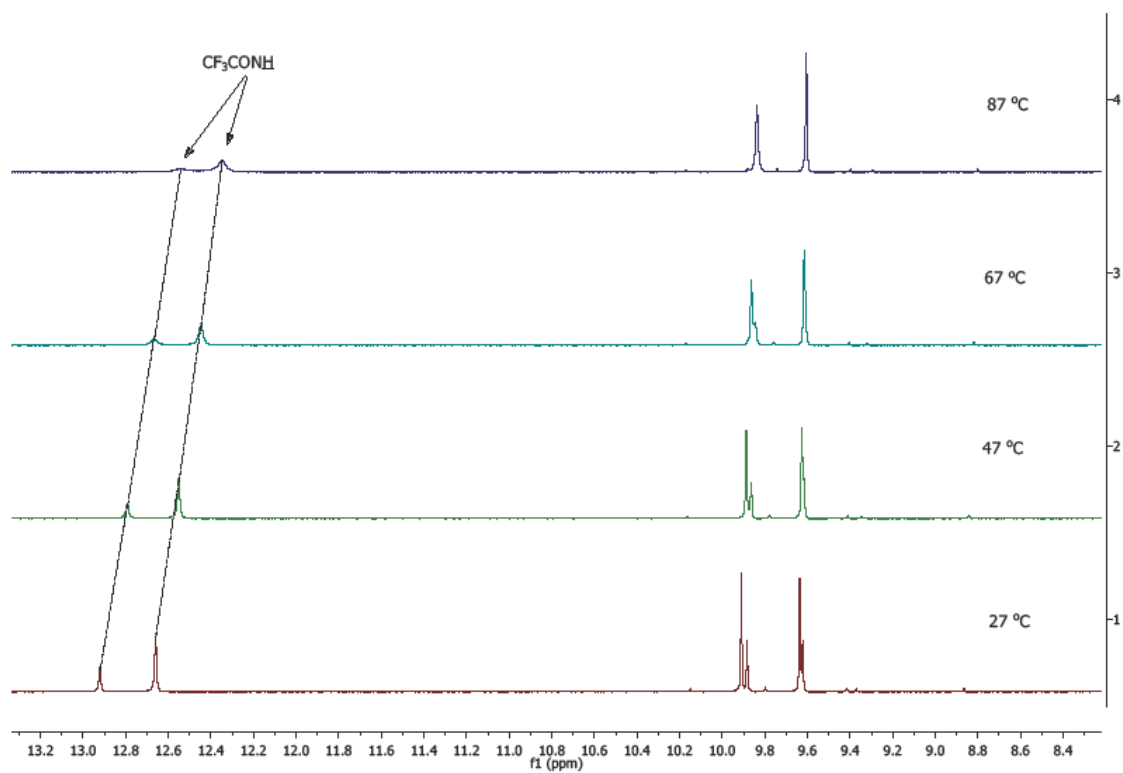

Expanded low field region of the variable temperature <sup>1</sup>H NMR spectra of **4**.

## IR spectra

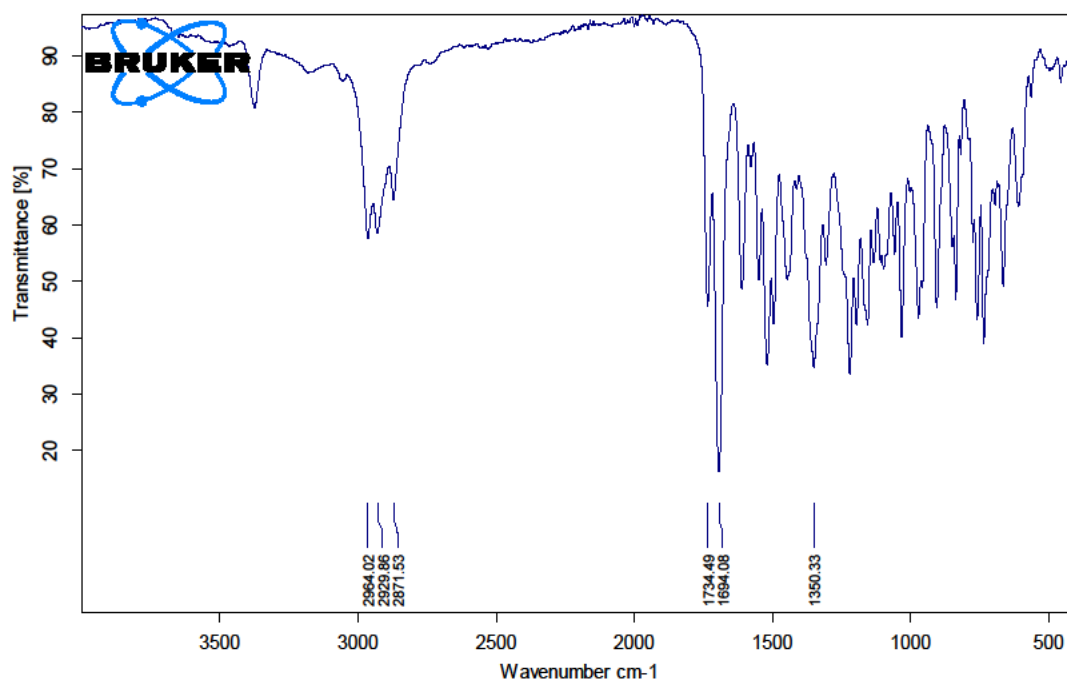

IR spectrum of 20-nitro-mesopyropheophorbide *a* methyl ester (**2a**)

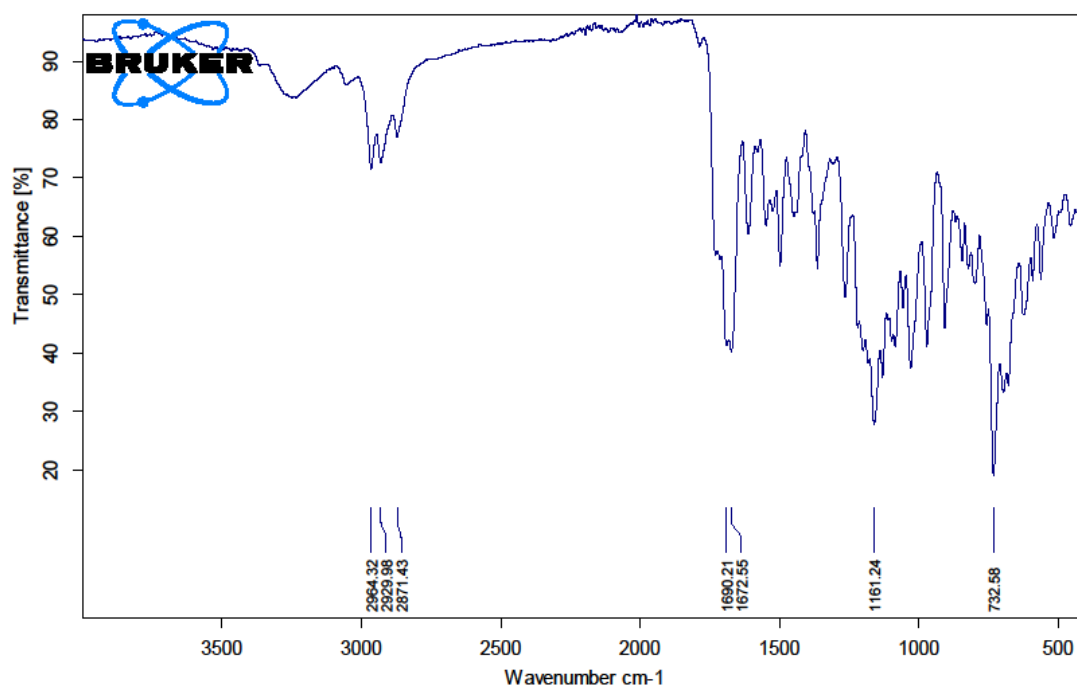

IR spectrum of 20-trifluoroacetamidemesopyropheophorbide *a* methyl ester (**3**)

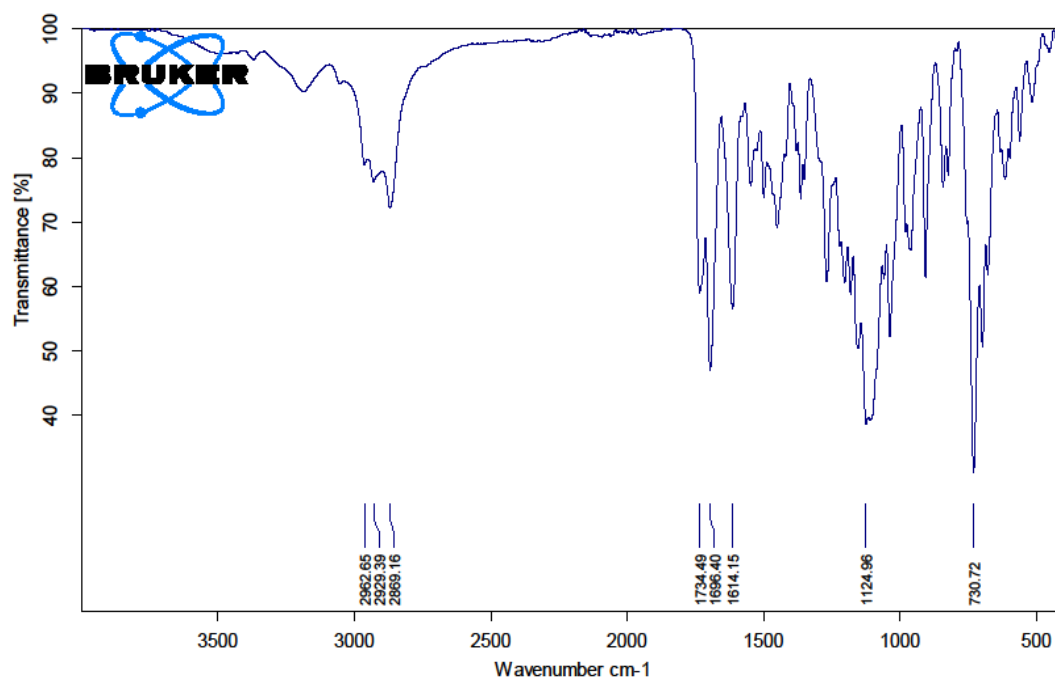

IR spectrum of 20-(trifluoroacetamide)-mesopyropheorbide *a* aza-18-crown-6-amide (**4**)

## Computational methods

All computations were performed using Turbomole 6.4 program package.<sup>1</sup> Solvation effects (chloroform) were taken into account using COSMO solvation model ( $\epsilon = 4.81$ ).<sup>2</sup> The MARI-J approximation was used with suitable auxiliary basis set.<sup>3,4</sup> The structures were first optimized using double  $\zeta$  quality basis set, def2-SVP,<sup>5</sup> and TPSS-D3 functional.<sup>6-7</sup> Vibrational frequencies were calculated numerically for those structures to obtain the chemical potential in solution at 298.15 K (chem. pot.) and to confirm the nature of the stationary point (minima). The Gibbs free energies were then calculated:  $G = E(0) + \text{chem. pot.}$

All structures were then reoptimized with a triple  $\zeta$  quality basis set, def2-TZVP.<sup>5</sup> Two functionals, TPSS-D3 and PBE-D3<sup>7,8</sup>, were both employed and nature of the result was the same in both cases. Structures were only slightly changed with upgrading the basis set, and therefore, due to computational cost, no vibrational frequencies were calculated for def2-TZVP structures. Figures on the structures were made with CylView.<sup>9</sup>

The structures with KCN adduct were also optimized with B3LYP/6-31\* in gas phase using Gaussian09.<sup>10</sup>

## Results

Table X. The energy difference between **4'** and **4''** with KCN adduct with various methods. The Gibbs free energies were calculated at 298.15 K and only for TPSS-D3/def2-SVP values. Energies are in kcal/mol.

| Method            | $\Delta E (\mathbf{4}' - \mathbf{4}'')$ | $\Delta G (\mathbf{4}' - \mathbf{4}'')$ |
|-------------------|-----------------------------------------|-----------------------------------------|
| TPSS-D3/def2-SVP  | 11.5                                    | 17.5                                    |
| TPSS-D3/def2-TZVP | 14.3                                    |                                         |
| PBE-D3/def2-TZVP  | 11.7                                    |                                         |
| B3LYP/6-31G*      | 15.5                                    |                                         |

Table X. The energy difference between **4'** and **4''** with KF adduct with various methods. The Gibbs free energies were calculated at 298.15 K and only for TPSS-D3/def2-SVP values. Energies are in kcal/mol.

| Method            | $\Delta E (\mathbf{4}' - \mathbf{4}'')$ | $\Delta G (\mathbf{4}' - \mathbf{4}'')$ |
|-------------------|-----------------------------------------|-----------------------------------------|
| TPSS-D3/def2-SVP  | 6.5                                     | 9.4                                     |
| TPSS-D3/def2-TZVP | 11.4                                    |                                         |
| PBE-D3/def2-TZVP  | 11.9                                    |                                         |

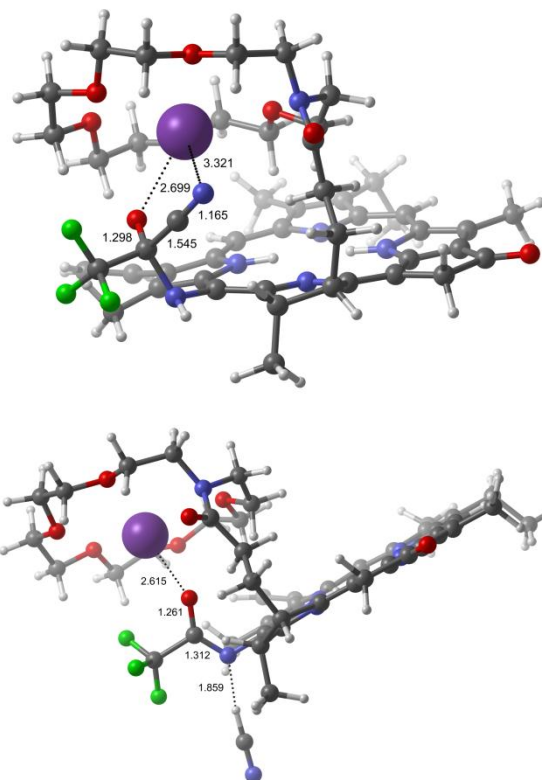

Figure S3. TPSS-D3/def2-TZVP optimized structures of **4'** and **4''** with KCN.

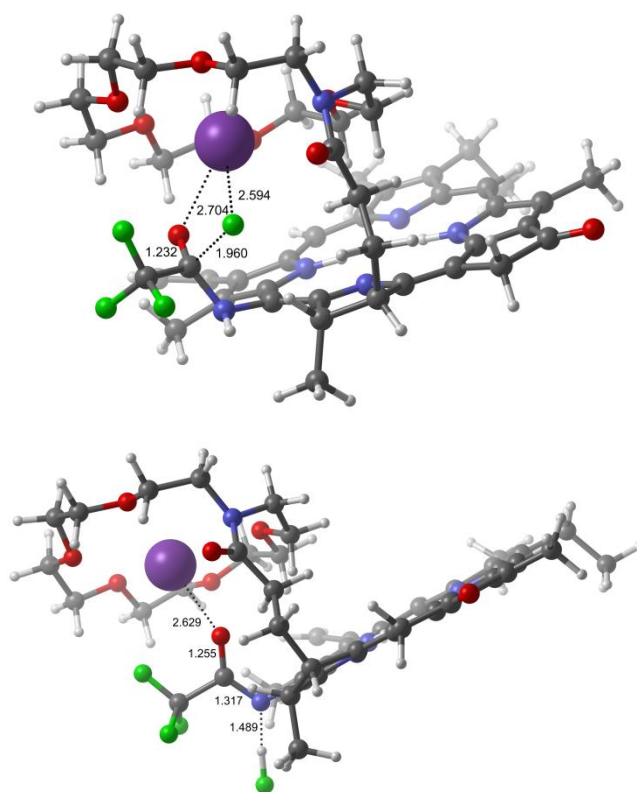

Figure S4. TPSS-D3/def2-TZVP optimized structures of **4'** and **4''** with KF.

## Computational References

1. a) Ahlrichs, R.; Baer, M.; Haeser, M.; Horn, H.; Koelmel, C. *Chem. Phys. Lett.* 1989, **162**, 165-169. b) Treutler, O.; Ahlrichs, R. *J. Chem. Phys.* 1995, **102**, 346–354. c) v. Arnim, M.; Ahlrichs, R. *J. Comput. Chem.* 1998, **19**, 1746–1757. d) v. Arnim, M.; Ahlrichs, R. *J. Chem. Phys.* 1999, **111**, 9183–9190.
2. Schäfer, A.; Klamt, A.; Sattel, D.; Lohrenz, J. C. W.; Eckert, F. *Phys. Chem. Chem. Phys.* 2000, **2**, 2187-2193.
3. Sierka, M.; Hogeckamp, A.; Ahlrichs, R. *J. Chem. Phys.* 2003, **118**, 9136–9148.
4. a) Eichkorn, K.; Weigend, F.; Treutler, O.; Ahlrichs, R. *Theor. Chem. Acc.* 1997, **97**, 119–124. b) Weigend, F. *Phys. Chem. Chem. Phys.* 2006, **8**, 1057–1065. c) Hellweg, A.; Hättig, C.; Höfener, S.; Klopper, W. *Theor. Chem. Acc.* 2007, **117**, 587–597.
5. a) Schäfer, A.; Huber, C.; Ahlrichs, R. *J. Chem. Phys.* 1994, **100**, 5829–5835. b) Weigend, F.; Häser, M.; Patzelt, H.; Ahlrichs, R. *Chem. Phys. Lett.* 1998, **294**, 143–152. c) Weigend, F.; Ahlrichs, R. *Phys. Chem. Chem. Phys.* 2005, **7**, 3297–3305.
6. Tao, J.; Perdew, J. P.; Staroverov, V. N.; Scuseria, G. E. *Phys. Rev. Lett.* 2003, **91**, 146401.
7. Grimme, S.; Antony, J.; Ehrlich, S.; Krieg, H. *J. Chem. Phys.* 2010, **132**, 154104.
8. Perdew, J. P., Burke, K., Ernzerhof, M. *Phys. Rev. Lett.* 1996, **77**, 3865-3868.
9. CYLview, 1.0b; Legault, C. Y., Université de Sherbrooke, 2009 (<http://www.cylview.org>)
10. Revision A.1, M. J. Frisch, G. W. Trucks, H. B. Schlegel, G. E. Scuseria, M. A. Robb, J. R. Cheeseman, G. Scalmani, V. Barone, B. Mennucci, G. A. Petersson, H. Nakatsuji, M. Caricato, X. Li, H. P. Hratchian, A. F. Izmaylov, J. Bloino, G. Zheng, J. L. Sonnenberg, M. Hada, M. Ehara, K. Toyota, R. Fukuda, J. Hasegawa, M. Ishida, T. Nakajima, Y. Honda, O. Kitao, H. Nakai, T. Vreven, J. A. Montgomery, Jr., J. E. Peralta, F. Ogliaro, M. Bearpark, J. J. Heyd, E. Brothers, K. N. Kudin, V. N. Staroverov, R. Kobayashi, J. Normand, K. Raghavachari, A. Rendell, J. C. Burant, S. S. Iyengar, J. Tomasi, M. Cossi, N. Rega, J. M. Millam, M. Klene, J. E. Knox, J. B. Cross, V. Bakken, C. Adamo, J. Jaramillo, R. Gomperts, R. E. Stratmann, O. Yazyev, A. J. Austin, R. Cammi, C. Pomelli, J. W. Ochterski, R. L. Martin, K. Morokuma, V. G. Zakrzewski, G. A. Voth, P. Salvador, J. J. Dannenberg, S. Dapprich, A. D. Daniels, Ö. Farkas, J. B. Foresman, J. V. Ortiz, J. Cioslowski, and D. J. Fox, Gaussian, Inc., Wallingford CT, 2009.

## XYZ coordinates and absolute energies

Energies are in Hartrees unless otherwise noted.

| 4' with KCN                                                                  | 4'' with KCN                                                                   |
|------------------------------------------------------------------------------|--------------------------------------------------------------------------------|
| TPSS-D3/def2-SVP<br>E(0): -3746.3659<br>chem. pot (298.15 K): 2312.84 kJ/mol | TPSS-D3/def2-SVP<br>E(0): -3746.384251<br>chem.pot. (298.15 K): 2287.83 kJ/mol |
| C -0.173374 -1.116349 2.519740                                               | C -0.685480 -0.503556 2.221183                                                 |
| C 0.261001 -2.444806 3.146025                                                | C -0.026471 -1.583038 3.082145                                                 |
| C -0.695936 -3.442427 2.450778                                               | C -0.724708 -2.859722 2.552060                                                 |
| C -1.809111 -2.505106 1.985185                                               | C -1.969618 -2.269406 1.897492                                                 |
| N -1.403107 -1.199662 1.964087                                               | N -1.835442 -0.930644 1.655554                                                 |
| C 0.618575 0.061470 2.594000                                                 | C -0.131931 0.795703 2.076035                                                  |
| C -3.026623 -2.933349 1.462301                                               | C -3.084679 -3.004017 1.500793                                                 |
| C -3.946874 -2.166208 0.715276                                               | C -4.192591 -2.529462 0.766408                                                 |
| C -5.024041 -2.931351 0.175953                                               | C -5.180576 -3.525812 0.507828                                                 |
| C -5.801367 -2.099765 -0.647264                                              | C -6.207893 -2.953589 -0.260193                                                |
| C -5.163108 -0.810319 -0.590961                                              | C -5.808419 -1.583626 -0.462301                                                |
| N -4.054588 -0.899918 0.257241                                               | N -4.588347 -1.377074 0.185924                                                 |
| C -5.464012 0.395613 -1.249526                                               | C -6.416624 -0.540936 -1.184324                                                |
| C -4.700564 1.569618 -1.112701                                               | C -5.855926 0.743562 -1.320721                                                 |
| C -4.978895 2.847713 -1.776247                                               | C -6.440182 1.844448 -2.096360                                                 |
| C -4.002618 3.720120 -1.339614                                               | C -5.555332 2.895938 -1.983132                                                 |

|             |           |           |             |           |           |
|-------------|-----------|-----------|-------------|-----------|-----------|
| C -3.142677 | 2.947344  | -0.431265 | C -4.450235 | 2.409590  | -1.139746 |
| N -3.579027 | 1.661695  | -0.313913 | N -4.655832 | 1.118695  | -0.754214 |
| C -2.013555 | 3.492741  | 0.213263  | C -3.339237 | 3.207088  | -0.798279 |
| C -1.048714 | 2.893106  | 1.030603  | C -2.226179 | 2.930180  | 0.007493  |
| C 0.032918  | 3.590228  | 1.701381  | C -1.126823 | 3.844264  | 0.269387  |
| C 0.791990  | 2.641878  | 2.399987  | C -0.211027 | 3.191753  | 1.108596  |
| C 0.207398  | 1.346814  | 2.131819  | C -0.728192 | 1.862357  | 1.349915  |
| N -0.904230 | 1.554982  | 1.337020  | N -1.935112 | 1.762730  | 0.679384  |
| C -4.874804 | -4.320111 | 0.619904  | C -4.736867 | -4.784311 | 1.115010  |
| C -3.567443 | -4.362026 | 1.464677  | C -3.356065 | -4.482964 | 1.770535  |
| C 0.204725  | 5.040266  | 1.642323  | C -1.070495 | 5.196413  | -0.286143 |
| C 1.344379  | 5.743747  | 1.834469  | C 0.028266  | 5.932331  | -0.570400 |
| C -0.041186 | -4.177597 | 1.237519  | C 0.147935  | -3.628295 | 1.521329  |
| C 0.064361  | -2.416068 | 4.678604  | C -0.291517 | -1.330748 | 4.580217  |
| C -0.015345 | -3.313102 | -0.027537 | C 0.444221  | -2.785994 | 0.277932  |
| C 1.905962  | 2.952989  | 3.350041  | C 1.057833  | 3.779998  | 1.652472  |
| C -3.811261 | 5.165595  | -1.697701 | C -5.661761 | 4.273932  | -2.569721 |
| C -6.145973 | 3.126506  | -2.685034 | C -7.768794 | 1.807628  | -2.802727 |
| C -7.019308 | -2.463791 | -1.441602 | C -7.451638 | -3.610251 | -0.778266 |
| C -7.444469 | 3.450991  | -1.915541 | C -8.962589 | 2.047471  | -1.853829 |
| C 0.941666  | -3.787963 | -1.105129 | C 1.462363  | -3.410395 | -0.657679 |
| O 1.660530  | -4.775886 | -0.959269 | O 2.043890  | -4.462132 | -0.372883 |
| H 1.312364  | -2.684625 | 2.914114  | H 1.062191  | -1.626723 | 2.914177  |
| H -1.064451 | -4.201900 | 3.160813  | H -0.986773 | -3.553308 | 3.369755  |
| H -1.857831 | 4.562849  | 0.050318  | H -3.338678 | 4.211680  | -1.230577 |
| H -0.585342 | -5.114878 | 1.027977  | H -0.351717 | -4.568897 | 1.228718  |
| H 0.988620  | -4.466910 | 1.506052  | H 1.096464  | -3.916239 | 2.008148  |
| H -0.991884 | -2.208762 | 4.925289  | H -1.376514 | -1.283930 | 4.781952  |
| H 0.343253  | -3.388871 | 5.119283  | H 0.140793  | -2.145626 | 5.187217  |
| H 0.679412  | -1.632391 | 5.155971  | H 0.164013  | -0.380503 | 4.902858  |
| H 0.287919  | -2.281333 | 0.221692  | H 0.854336  | -1.800569 | 0.572126  |
| H -1.035728 | -3.237186 | -0.442340 | H -0.496432 | -2.584605 | -0.266717 |
| H 2.867897  | 3.026243  | 2.816380  | H 1.922074  | 3.483121  | 1.029108  |
| H 1.711267  | 3.915950  | 3.854167  | H 0.997080  | 4.880343  | 1.656929  |
| H 2.022616  | 2.152426  | 4.092996  | H 1.266935  | 3.423515  | 2.668885  |
| H -4.561106 | 5.499507  | -2.433548 | H -6.558355 | 4.370993  | -3.203873 |
| H -3.900965 | 5.818149  | -0.808971 | H -5.726213 | 5.045441  | -1.779457 |
| H -2.809458 | 5.347808  | -2.130455 | H -4.780526 | 4.521312  | -3.190696 |
| H -5.898335 | 3.972317  | -3.351929 | H -7.781369 | 2.570465  | -3.602191 |
| H -6.321353 | 2.256411  | -3.345266 | H -7.896006 | 0.831739  | -3.308092 |
| H -7.902149 | -1.888904 | -1.105665 | H -8.358894 | -3.123665 | -0.374957 |
| H -6.879689 | -2.244453 | -2.515998 | H -7.511388 | -3.544285 | -1.880198 |
| H -7.238200 | -3.536510 | -1.326542 | H -7.466758 | -4.672122 | -0.488421 |
| H -8.279463 | 3.640831  | -2.613426 | H -9.919110 | 2.004666  | -2.404818 |
| H -7.730765 | 2.614178  | -1.254091 | H -8.990858 | 1.286062  | -1.054235 |
| H -7.309319 | 4.346695  | -1.283947 | H -8.883898 | 3.037711  | -1.371405 |
| H -2.872958 | -5.091130 | 1.007178  | H -2.596508 | -5.154951 | 1.328965  |
| H 1.339522  | 6.837188  | 1.764041  | H -0.071723 | 6.942720  | -0.982281 |
| H 2.306051  | 5.266229  | 2.044186  | H 1.046903  | 5.560568  | -0.420991 |
| H -0.701435 | 5.611913  | 1.398930  | H -2.045720 | 5.650669  | -0.510019 |
| O -5.592103 | -5.291086 | 0.389347  | O -5.293238 | -5.879992 | 1.126025  |
| H -3.792694 | -4.738503 | 2.480558  | H -3.399354 | -4.724389 | 2.849642  |
| H -6.338595 | 0.409835  | -1.906173 | H -7.368850 | -0.754298 | -1.678382 |
| H -3.477970 | -0.049882 | 0.407778  | H -4.145616 | -0.440244 | 0.118657  |
| H -1.535576 | 0.793359  | 1.075035  | H -2.483284 | 0.897208  | 0.679253  |
| N 1.925719  | -0.030636 | 3.122998  | N 1.126464  | 1.032563  | 2.669924  |
| C 3.055608  | 0.031884  | 2.084702  | C 2.169069  | 0.497297  | 2.066344  |
| O 2.901614  | 0.930086  | 1.159924  | O 2.234432  | -0.201673 | 1.019092  |
| C 4.376680  | 0.160344  | 2.922473  | C 3.502264  | 0.790602  | 2.799226  |
| F 4.482397  | 1.347962  | 3.547186  | F 3.682268  | 2.116006  | 3.048665  |
| F 4.465915  | -0.812495 | 3.878036  | F 3.576240  | 0.149062  | 3.991061  |



|                                                       |                                                       |
|-------------------------------------------------------|-------------------------------------------------------|
| F 5.457102 0.028192 2.116459                          | F 4.571592 0.385850 2.059455                          |
| H 2.049367 -0.846792 3.726689                         | H 1.231926 1.792613 4.330550                          |
| K 2.399886 0.096914 -1.349608                         | K 3.874813 -0.185747 -1.009317                        |
| O 0.859926 2.426586 -1.687559                         | O 3.061631 2.571513 -1.180511                         |
| C 1.492222 3.705657 -1.622085                         | C 4.062232 3.587719 -1.202697                         |
| C 2.732429 3.595917 -0.759709                         | C 5.181280 3.184889 -0.263288                         |
| O 3.681453 2.788310 -1.457912                         | O 5.792118 2.010103 -0.795396                         |
| C 4.897422 2.582668 -0.735310                         | C 6.946147 1.567315 -0.081740                         |
| C 5.779436 1.670216 -1.562528                         | C 7.578238 0.444219 -0.879080                         |
| O 5.170008 0.382372 -1.631341                         | O 6.678307 -0.664326 -0.926202                        |
| C 5.869160 -0.536871 -2.461100                        | C 7.106238 -1.685373 -1.825976                        |
| C 5.296289 -1.924834 -2.264043                        | C 6.186453 -2.883217 -1.717878                        |
| O 3.947399 -1.984530 -2.736752                        | O 4.870997 -2.552862 -2.174802                        |
| C -0.166341 2.350805 -2.670490                        | C 2.030262 2.765405 -2.150044                         |
| C -0.976353 1.094136 -2.445708                        | C 0.937643 1.746360 -1.919114                         |
| O -0.167941 -0.076949 -2.630333                       | O 1.378981 0.429091 -2.268985                         |
| C 3.483177 -3.340957 -2.749003                        | C 4.071904 -3.737097 -2.310683                        |
| C 2.040646 -3.425422 -3.235301                        | C 2.657990 -3.417027 -2.785478                        |
| N 1.018128 -2.988207 -2.256745                        | N 1.759659 -2.715456 -1.835290                        |
| C -0.250822 -2.506647 -2.869909                       | C 0.695601 -1.905111 -2.490242                        |
| C -0.925996 -1.249293 -2.328055                       | C 0.363217 -0.522275 -1.934086                        |
| H 0.797517 4.450372 -1.183193                         | H 3.635790 4.560556 -0.880059                         |
| H 1.777469 4.044811 -2.639683                         | H 4.467210 3.708905 -2.228666                         |
| H 2.481905 3.137857 0.216263                          | H 4.786094 2.995414 0.755063                          |
| H 3.140100 4.614133 -0.584601                         | H 5.917647 4.012710 -0.200236                         |
| H 4.679029 2.114977 0.244398                          | H 6.669426 1.220398 0.933864                          |
| H 5.422940 3.548774 -0.576265                         | H 7.682224 2.391477 0.020918                          |
| H 6.781939 1.596602 -1.090837                         | H 8.536667 0.144923 -0.406274                         |
| H 5.906812 2.090606 -2.582848                         | H 7.795077 0.803352 -1.906479                         |
| H 6.945366 -0.565788 -2.189135                        | H 8.136148 -2.014963 -1.575896                        |
| H 5.793553 -0.235202 -3.527994                        | H 7.112025 -1.301249 -2.868053                        |
| H 5.334268 -2.198272 -1.189665                        | H 6.148230 -3.240771 -0.667742                        |
| H 5.926238 -2.644656 -2.827867                        | H 6.609685 -3.698345 -2.340580                        |
| H 0.273517 2.362699 -3.690799                         | H 2.443577 2.674828 -3.176612                         |
| H -0.857864 3.214136 -2.581973                        | H 1.586730 3.776414 -2.045442                         |
| H -1.825443 1.081147 -3.160560                        | H 0.053426 2.022163 -2.530682                         |
| H -1.402582 1.102568 -1.426159                        | H 0.639714 1.769791 -0.854756                         |
| H 3.586275 -3.786504 -1.745165                        | H 4.046758 -4.291224 -1.357916                        |
| H 4.107436 -3.931302 -3.453356                        | H 4.528040 -4.394292 -3.081279                        |
| H 1.851733 -4.474969 -3.534325                        | H 2.201145 -4.381799 -3.082957                        |
| H 1.935593 -2.789135 -4.128561                        | H 2.728996 -2.786224 -3.685921                        |
| H -1.006041 -3.316342 -2.847522                       | H -0.246415 -2.485571 -2.517607                       |
| H -0.027790 -2.314090 -3.930912                       | H 1.007717 -1.763349 -3.536736                        |
| H -1.129791 -1.296349 -1.241396                       | H 0.203218 -0.517738 -0.841616                        |
| H -1.912787 -1.190829 -2.833749                       | H -0.593138 -0.217042 -2.409409                       |
| C 3.135978 -1.376896 1.436248                         | C 1.286407 2.260646 5.353290                          |
| N 3.086149 -2.328637 0.752131                         | N 1.355676 2.742424 6.413060                          |
| <b>TPSS-D3/def2-TZVP</b><br><b>E(0): -3749.843844</b> | <b>TPSS-D3/def2-TZVP</b><br><b>E(0): -3749.866666</b> |
| C -0.198165 -1.106387 2.503945                        | C -0.680679 -0.576924 2.286283                        |
| C 0.239448 -2.430497 3.127231                         | C -0.054638 -1.668605 3.147662                        |
| C -0.709426 -3.433104 2.436061                        | C -0.759050 -2.930415 2.601908                        |
| C -1.818593 -2.506549 1.957924                        | C -1.975282 -2.323915 1.920783                        |
| N -1.421135 -1.198885 1.941166                        | N -1.819880 -0.986064 1.692423                        |
| C 0.578785 0.073560 2.585212                          | C -0.111023 0.709038 2.162037                         |
| C -3.026961 -2.936584 1.438557                        | C -3.085504 -3.033413 1.495344                        |
| C -3.954964 -2.176339 0.707469                        | C -4.167796 -2.537561 0.750999                        |
| C -5.030371 -2.934881 0.171172                        | C -5.166997 -3.505115 0.460733                        |

|             |           |           |             |           |           |
|-------------|-----------|-----------|-------------|-----------|-----------|
| C -5.810671 | -2.097542 | -0.638096 | C -6.162671 | -2.901471 | -0.318282 |
| C -5.179295 | -0.814646 | -0.577253 | C -5.736020 | -1.545238 | -0.495587 |
| N -4.068224 | -0.910408 | 0.263876  | N -4.527280 | -1.373195 | 0.180349  |
| C -5.478885 | 0.389850  | -1.225845 | C -6.305121 | -0.487555 | -1.214851 |
| C -4.721687 | 1.557452  | -1.093420 | C -5.727980 | 0.782004  | -1.327634 |
| C -5.005066 | 2.830450  | -1.752241 | C -6.281535 | 1.895229  | -2.097084 |
| C -4.034022 | 3.700971  | -1.327806 | C -5.391910 | 2.928732  | -1.960781 |
| C -3.169065 | 2.939590  | -0.424806 | C -4.310500 | 2.427874  | -1.107125 |
| N -3.596747 | 1.654898  | -0.300657 | N -4.534187 | 1.137769  | -0.736185 |
| C -2.047710 | 3.487882  | 0.215551  | C -3.200333 | 3.201819  | -0.740685 |
| C -1.088028 | 2.893689  | 1.029434  | C -2.113580 | 2.896583  | 0.077246  |
| C -0.009378 | 3.586407  | 1.694517  | C -1.007156 | 3.779445  | 0.369484  |
| C 0.748194  | 2.646341  | 2.389268  | C -0.121291 | 3.104949  | 1.210023  |
| C 0.169502  | 1.352253  | 2.129375  | C -0.661011 | 1.786546  | 1.430549  |
| N -0.941972 | 1.558838  | 1.336781  | N -1.854625 | 1.717314  | 0.735693  |
| C -4.868570 | -4.318348 | 0.599695  | C -4.755846 | -4.771072 | 1.056558  |
| C -3.558060 | -4.366031 | 1.432094  | C -3.383943 | -4.508819 | 1.737921  |
| C 0.153975  | 5.032294  | 1.640341  | C -0.917993 | 5.134287  | -0.160039 |
| C 1.290457  | 5.730362  | 1.808871  | C 0.198565  | 5.828912  | -0.437241 |
| C -0.043701 | -4.177771 | 1.238031  | C 0.128436  | -3.705006 | 1.592311  |
| C 0.027190  | -2.408757 | 4.656407  | C -0.348935 | -1.430561 | 4.640752  |
| C -0.002195 | -3.312580 | -0.023548 | C 0.457464  | -2.850228 | 0.369083  |
| C 1.852764  | 2.970222  | 3.341356  | C 1.137254  | 3.681889  | 1.782419  |
| C -3.853508 | 5.143852  | -1.689225 | C -5.475761 | 4.310487  | -2.534396 |
| C -6.171117 | 3.103320  | -2.657030 | C -7.591269 | 1.881097  | -2.829870 |
| C -7.043222 | -2.442290 | -1.411511 | C -7.419110 | -3.509152 | -0.855883 |
| C -7.457474 | 3.452009  | -1.879185 | C -8.793492 | 2.157446  | -1.902874 |
| C 0.952364  | -3.788763 | -1.098419 | C 1.469211  | -3.472709 | -0.568519 |
| O 1.659308  | -4.785235 | -0.962858 | O 2.061359  | -4.518550 | -0.287402 |
| H 1.283739  | -2.666051 | 2.903835  | H 1.027596  | -1.726078 | 2.999644  |
| H -1.076541 | -4.180150 | 3.147130  | H -1.045739 | -3.614899 | 3.407595  |
| H -1.894015 | 4.549493  | 0.048543  | H -3.176973 | 4.203590  | -1.158293 |
| H -0.588149 | -5.103515 | 1.027386  | H -0.374629 | -4.626326 | 1.279770  |
| H 0.972336  | -4.465997 | 1.522817  | H 1.052362  | -4.003066 | 2.099186  |
| H -1.027247 | -2.222702 | 4.888108  | H -1.429222 | -1.377212 | 4.816260  |
| H 0.315459  | -3.372378 | 5.088788  | H 0.059715  | -2.251939 | 5.239250  |
| H 0.617545  | -1.624718 | 5.143076  | H 0.103944  | -0.496632 | 4.983065  |
| H 0.303705  | -2.292425 | 0.231614  | H 0.880977  | -1.886358 | 0.683274  |
| H -1.011426 | -3.230457 | -0.442647 | H -0.466450 | -2.621874 | -0.175034 |
| H 2.815758  | 3.010657  | 2.823925  | H 2.006057  | 3.404710  | 1.170788  |
| H 1.664883  | 3.945707  | 3.803311  | H 1.071992  | 4.773408  | 1.801019  |
| H 1.940427  | 2.204177  | 4.111542  | H 1.326161  | 3.317331  | 2.790669  |
| H -4.593474 | 5.461408  | -2.429274 | H -6.340182 | 4.410705  | -3.196971 |
| H -3.961635 | 5.793058  | -0.810865 | H -5.573340 | 5.065658  | -1.743869 |
| H -2.856915 | 5.332141  | -2.108649 | H -4.577763 | 4.561583  | -3.112667 |
| H -5.924588 | 3.930696  | -3.332862 | H -7.572687 | 2.632212  | -3.628176 |
| H -6.360447 | 2.230043  | -3.293958 | H -7.731816 | 0.910428  | -3.322204 |
| H -7.943653 | -2.224551 | -0.822282 | H -8.280108 | -3.239044 | -0.230585 |
| H -7.109955 | -1.866134 | -2.339738 | H -7.630366 | -3.159028 | -1.871816 |
| H -7.057835 | -3.507942 | -1.653798 | H -7.343017 | -4.598910 | -0.866080 |
| H -8.289918 | 3.636094  | -2.567432 | H -9.732800 | 2.130837  | -2.466429 |
| H -7.739530 | 2.634187  | -1.207568 | H -8.849199 | 1.409855  | -1.104383 |
| H -7.306275 | 4.349859  | -1.270486 | H -8.698384 | 3.142909  | -1.434484 |
| H -2.869782 | -5.079254 | 0.962604  | H -2.636798 | -5.179228 | 1.295945  |
| H 1.283995  | 6.814701  | 1.748192  | H 0.137251  | 6.840708  | -0.826751 |
| H 2.249056  | 5.256518  | 1.990585  | H 1.193197  | 5.417069  | -0.302980 |
| H -0.752243 | 5.598588  | 1.426981  | H -1.871763 | 5.620229  | -0.364149 |
| O -5.580603 | -5.293880 | 0.368265  | O -5.329012 | -5.858724 | 1.046627  |
| H -3.774332 | -4.747577 | 2.437842  | H -3.450012 | -4.762646 | 2.803344  |
| H -6.349171 | 0.408060  | -1.873965 | H -7.243664 | -0.676322 | -1.726072 |
| H -3.486145 | -0.077486 | 0.420485  | H -4.057341 | -0.459922 | 0.142723  |

|                                                      |                                                      |
|------------------------------------------------------|------------------------------------------------------|
| H -1.570455 0.805010 1.073270                        | H -2.420007 0.872516 0.711012                        |
| N 1.875989 -0.009052 3.149536                        | N 1.117244 0.937150 2.828458                         |
| C 3.033199 0.018115 2.137622                         | C 2.189755 0.437682 2.260876                         |
| O 2.930509 0.914570 1.204798                         | O 2.325844 -0.226262 1.197599                        |
| C 4.331753 0.130289 3.022138                         | C 3.506068 0.700729 3.027391                         |
| F 4.437646 1.324545 3.639126                         | F 3.414370 1.600942 4.036154                         |
| F 4.381645 -0.832566 3.998235                        | F 3.999517 -0.450315 3.565205                        |
| F 5.443523 -0.027488 2.259077                        | F 4.469797 1.169945 2.172987                         |
| H 1.971200 -0.818973 3.758273                        | H 0.891348 1.786847 4.466023                         |
| K 2.450621 0.091896 -1.320716                        | K 3.798945 -0.120085 -0.960322                       |
| O 0.933108 2.435012 -1.706669                        | O 2.925122 2.602991 -1.390964                        |
| C 1.576228 3.716999 -1.672184                        | C 3.902316 3.636953 -1.558937                        |
| C 2.817999 3.608944 -0.817582                        | C 5.071041 3.343609 -0.645703                        |
| O 3.759813 2.784417 -1.520949                        | O 5.699735 2.143847 -1.117931                        |
| C 4.976313 2.576387 -0.784706                        | C 6.877929 1.787991 -0.381824                        |
| C 5.850144 1.649535 -1.598677                        | C 7.521183 0.616261 -1.087211                        |
| O 5.240745 0.351422 -1.625025                        | O 6.646709 -0.520278 -1.003065                       |
| C 5.904576 -0.550351 -2.514467                       | C 7.078668 -1.585200 -1.861448                       |
| C 5.330311 -1.936430 -2.335013                       | C 6.179488 -2.784379 -1.678372                       |
| O 3.964614 -1.976826 -2.785034                       | O 4.852108 -2.496531 -2.154404                       |
| C -0.110857 2.367059 -2.681334                       | C 1.842732 2.711749 -2.326864                        |
| C -0.923878 1.120280 -2.436174                       | C 0.803521 1.672447 -1.987975                        |
| O -0.125986 -0.060136 -2.663195                      | O 1.286422 0.351210 -2.301371                        |
| C 3.488691 -3.338237 -2.753085                       | C 4.086864 -3.718493 -2.215448                       |
| C 2.045243 -3.416581 -3.229748                       | C 2.663486 -3.462620 -2.691078                       |
| N 1.036297 -2.977522 -2.235485                       | N 1.751374 -2.776454 -1.741394                       |
| C -0.240812 -2.494028 -2.838990                      | C 0.655667 -2.005224 -2.397502                       |
| C -0.888095 -1.222849 -2.304827                      | C 0.314257 -0.617293 -1.867468                       |
| H 0.891950 4.462622 -1.241645                        | H 3.467644 4.615152 -1.302424                        |
| H 1.848210 4.028399 -2.692028                        | H 4.243112 3.668962 -2.604693                        |
| H 2.579545 3.158846 0.155276                         | H 4.730306 3.213082 0.391647                         |
| H 3.237857 4.614397 -0.658428                        | H 5.781390 4.183159 -0.679905                        |
| H 4.744622 2.131238 0.192690                         | H 6.618325 1.529350 0.655060                         |
| H 5.498814 3.535188 -0.639790                        | H 7.586111 2.630043 -0.365385                        |
| H 6.849845 1.583748 -1.142438                        | H 8.487604 0.381911 -0.616330                        |
| H 5.956798 2.034653 -2.624669                        | H 7.695684 0.872149 -2.142756                        |
| H 6.980365 -0.588841 -2.281753                       | H 8.108279 -1.879816 -1.606468                       |
| H 5.785620 -0.211263 -3.555537                       | H 7.061016 -1.248310 -2.909046                       |
| H 5.379382 -2.233598 -1.277203                       | H 6.138967 -3.078813 -0.619010                       |
| H 5.932734 -2.643875 -2.925898                       | H 6.603116 -3.621365 -2.253764                       |
| H 0.317552 2.373057 -3.695698                        | H 2.217298 2.577141 -3.352972                        |
| H -0.783825 3.232185 -2.580345                       | H 1.377447 3.705718 -2.251124                        |
| H -1.790581 1.111673 -3.114259                       | H -0.111875 1.873045 -2.564541                       |
| H -1.299856 1.119050 -1.406560                       | H 0.562163 1.730227 -0.919317                        |
| H 3.597691 -3.740571 -1.741909                       | H 4.097725 -4.210001 -1.239433                       |
| H 4.103227 -3.942446 -3.438593                       | H 4.557704 -4.389814 -2.950582                       |
| H 1.846955 -4.454442 -3.529798                       | H 2.240188 -4.439584 -2.963118                       |
| H 1.932852 -2.777169 -4.108968                       | H 2.704458 -2.847783 -3.593689                       |
| H -0.995081 -3.289989 -2.779648                      | H -0.265450 -2.601489 -2.378649                      |
| H -0.036371 -2.332493 -3.899839                      | H 0.937364 -1.894176 -3.447046                       |
| H -1.040836 -1.239396 -1.218264                      | H 0.233623 -0.577805 -0.775821                       |
| H -1.882896 -1.161728 -2.773760                      | H -0.667525 -0.350006 -2.288857                      |
| C 3.121580 -1.386014 1.498712                        | C 0.629180 2.308761 5.411056                         |
| N 3.105865 -2.345190 0.838300                        | N 0.353730 2.855514 6.393076                         |
| <b>PBE-D3/def2-TZVP</b><br><b>E(0): -3745.352753</b> | <b>PBE-D3/def2-TZVP</b><br><b>E(0): -3745.371416</b> |
| C -0.680679 -0.576924 2.286283                       | C -0.680679 -0.576924 2.286283                       |
| C -0.054638 -1.668605 3.147662                       | C -0.054638 -1.668605 3.147662                       |

|                                 |                                 |
|---------------------------------|---------------------------------|
| C -0.759050 -2.930415 2.601908  | C -0.759050 -2.930415 2.601908  |
| C -1.975282 -2.323915 1.920783  | C -1.975282 -2.323915 1.920783  |
| N -1.819880 -0.986064 1.692423  | N -1.819880 -0.986064 1.692423  |
| C -0.111023 0.709038 2.162037   | C -0.111023 0.709038 2.162037   |
| C -3.085504 -3.033413 1.495344  | C -3.085504 -3.033413 1.495344  |
| C -4.167796 -2.537561 0.750999  | C -4.167796 -2.537561 0.750999  |
| C -5.166997 -3.505115 0.460733  | C -5.166997 -3.505115 0.460733  |
| C -6.162671 -2.901471 -0.318282 | C -6.162671 -2.901471 -0.318282 |
| C -5.736020 -1.545238 -0.495587 | C -5.736020 -1.545238 -0.495587 |
| N -4.527280 -1.373195 0.180349  | N -4.527280 -1.373195 0.180349  |
| C -6.305121 -0.487555 -1.214851 | C -6.305121 -0.487555 -1.214851 |
| C -5.727980 0.782004 -1.327634  | C -5.727980 0.782004 -1.327634  |
| C -6.281535 1.895229 -2.097084  | C -6.281535 1.895229 -2.097084  |
| C -5.391910 2.928732 -1.960781  | C -5.391910 2.928732 -1.960781  |
| C -4.310500 2.427874 -1.107125  | C -4.310500 2.427874 -1.107125  |
| N -4.534187 1.137769 -0.736185  | N -4.534187 1.137769 -0.736185  |
| C -3.200333 3.201819 -0.740685  | C -3.200333 3.201819 -0.740685  |
| C -2.113580 2.896583 0.077246   | C -2.113580 2.896583 0.077246   |
| C -1.007156 3.779445 0.369484   | C -1.007156 3.779445 0.369484   |
| C -0.121291 3.104949 1.210023   | C -0.121291 3.104949 1.210023   |
| C -0.661011 1.786546 1.430549   | C -0.661011 1.786546 1.430549   |
| N -1.854625 1.717314 0.735693   | N -1.854625 1.717314 0.735693   |
| C -4.755846 -4.771072 1.056558  | C -4.755846 -4.771072 1.056558  |
| C -3.383943 -4.508819 1.737921  | C -3.383943 -4.508819 1.737921  |
| C -0.917993 5.134287 -0.160039  | C -0.917993 5.134287 -0.160039  |
| C 0.198565 5.828912 -0.437241   | C 0.198565 5.828912 -0.437241   |
| C 0.128436 -3.705006 1.592311   | C 0.128436 -3.705006 1.592311   |
| C -0.348935 -1.430561 4.640752  | C -0.348935 -1.430561 4.640752  |
| C 0.457464 -2.850228 0.369083   | C 0.457464 -2.850228 0.369083   |
| C 1.137254 3.681889 1.782419    | C 1.137254 3.681889 1.782419    |
| C -5.475761 4.310487 -2.534396  | C -5.475761 4.310487 -2.534396  |
| C -7.591269 1.881097 -2.829870  | C -7.591269 1.881097 -2.829870  |
| C -7.419110 -3.509152 -0.855883 | C -7.419110 -3.509152 -0.855883 |
| C -8.793492 2.157446 -1.902874  | C -8.793492 2.157446 -1.902874  |
| C 1.469211 -3.472709 -0.568519  | C 1.469211 -3.472709 -0.568519  |
| O 2.061359 -4.518550 -0.287402  | O 2.061359 -4.518550 -0.287402  |
| H 1.027596 -1.726078 2.999644   | H 1.027596 -1.726078 2.999644   |
| H -1.045739 -3.614899 3.407595  | H -1.045739 -3.614899 3.407595  |
| H -3.176973 4.203590 -1.158293  | H -3.176973 4.203590 -1.158293  |
| H -0.374629 -4.626326 1.279770  | H -0.374629 -4.626326 1.279770  |
| H 1.052362 -4.003066 2.099186   | H 1.052362 -4.003066 2.099186   |
| H -1.429222 -1.377212 4.816260  | H -1.429222 -1.377212 4.816260  |
| H 0.059715 -2.251939 5.239250   | H 0.059715 -2.251939 5.239250   |
| H 0.103944 -0.496632 4.983065   | H 0.103944 -0.496632 4.983065   |
| H 0.880977 -1.886358 0.683274   | H 0.880977 -1.886358 0.683274   |
| H -0.466450 -2.621874 -0.175034 | H -0.466450 -2.621874 -0.175034 |
| H 2.006057 3.404710 1.170788    | H 2.006057 3.404710 1.170788    |
| H 1.071992 4.773408 1.801019    | H 1.071992 4.773408 1.801019    |
| H 1.326161 3.317331 2.790669    | H 1.326161 3.317331 2.790669    |
| H -6.340182 4.410705 -3.196971  | H -6.340182 4.410705 -3.196971  |
| H -5.573340 5.065658 -1.743869  | H -5.573340 5.065658 -1.743869  |
| H -4.577763 4.561583 -3.112667  | H -4.577763 4.561583 -3.112667  |
| H -7.572687 2.632212 -3.628176  | H -7.572687 2.632212 -3.628176  |
| H -7.731816 0.910428 -3.322204  | H -7.731816 0.910428 -3.322204  |
| H -8.280108 -3.239044 -0.230585 | H -8.280108 -3.239044 -0.230585 |
| H -7.630366 -3.159028 -1.871816 | H -7.630366 -3.159028 -1.871816 |
| H -7.343017 -4.598910 -0.866080 | H -7.343017 -4.598910 -0.866080 |
| H -9.732800 2.130837 -2.466429  | H -9.732800 2.130837 -2.466429  |
| H -8.849199 1.409855 -1.104383  | H -8.849199 1.409855 -1.104383  |
| H -8.698384 3.142909 -1.434484  | H -8.698384 3.142909 -1.434484  |
| H -2.636798 -5.179228 1.295945  | H -2.636798 -5.179228 1.295945  |

|                                 |                                 |
|---------------------------------|---------------------------------|
| H 0.137251 6.840708 -0.826751   | H 0.137251 6.840708 -0.826751   |
| H 1.193197 5.417069 -0.302980   | H 1.193197 5.417069 -0.302980   |
| H -1.871763 5.620229 -0.364149  | H -1.871763 5.620229 -0.364149  |
| O -5.329012 -5.858724 1.046627  | O -5.329012 -5.858724 1.046627  |
| H -3.450012 -4.762646 2.803344  | H -3.450012 -4.762646 2.803344  |
| H -7.243664 -0.676322 -1.726072 | H -7.243664 -0.676322 -1.726072 |
| H -4.057341 -0.459922 0.142723  | H -4.057341 -0.459922 0.142723  |
| H -2.420007 0.872516 0.711012   | H -2.420007 0.872516 0.711012   |
| N 1.117244 0.937150 2.828458    | N 1.117244 0.937150 2.828458    |
| C 2.189755 0.437682 2.260876    | C 2.189755 0.437682 2.260876    |
| O 2.325844 -0.226262 1.197599   | O 2.325844 -0.226262 1.197599   |
| C 3.506068 0.700729 3.027391    | C 3.506068 0.700729 3.027391    |
| F 3.414370 1.600942 4.036154    | F 3.414370 1.600942 4.036154    |
| F 3.999517 -0.450315 3.565205   | F 3.999517 -0.450315 3.565205   |
| F 4.469797 1.169945 2.172987    | F 4.469797 1.169945 2.172987    |
| H 0.891348 1.786847 4.466023    | H 0.891348 1.786847 4.466023    |
| K 3.798945 -0.120085 -0.960322  | K 3.798945 -0.120085 -0.960322  |
| O 2.925122 2.602991 -1.390964   | O 2.925122 2.602991 -1.390964   |
| C 3.902316 3.636953 -1.558937   | C 3.902316 3.636953 -1.558937   |
| C 5.071041 3.343609 -0.645703   | C 5.071041 3.343609 -0.645703   |
| O 5.699735 2.143847 -1.117931   | O 5.699735 2.143847 -1.117931   |
| C 6.877929 1.787991 -0.381824   | C 6.877929 1.787991 -0.381824   |
| C 7.521183 0.616261 -1.087211   | C 7.521183 0.616261 -1.087211   |
| O 6.646709 -0.520278 -1.003065  | O 6.646709 -0.520278 -1.003065  |
| C 7.078668 -1.585200 -1.861448  | C 7.078668 -1.585200 -1.861448  |
| C 6.179488 -2.784379 -1.678372  | C 6.179488 -2.784379 -1.678372  |
| O 4.852108 -2.496531 -2.154404  | O 4.852108 -2.496531 -2.154404  |
| C 1.842732 2.711749 -2.326864   | C 1.842732 2.711749 -2.326864   |
| C 0.803521 1.672447 -1.987975   | C 0.803521 1.672447 -1.987975   |
| O 1.286422 0.351210 -2.301371   | O 1.286422 0.351210 -2.301371   |
| C 4.086864 -3.718493 -2.215448  | C 4.086864 -3.718493 -2.215448  |
| C 2.663486 -3.462620 -2.691078  | C 2.663486 -3.462620 -2.691078  |
| N 1.751374 -2.776454 -1.741394  | N 1.751374 -2.776454 -1.741394  |
| C 0.655667 -2.005224 -2.397502  | C 0.655667 -2.005224 -2.397502  |
| C 0.314257 -0.617293 -1.867468  | C 0.314257 -0.617293 -1.867468  |
| H 3.467644 4.615152 -1.302424   | H 3.467644 4.615152 -1.302424   |
| H 4.243112 3.668962 -2.604693   | H 4.243112 3.668962 -2.604693   |
| H 4.730306 3.213082 0.391647    | H 4.730306 3.213082 0.391647    |
| H 5.781390 4.183159 -0.679905   | H 5.781390 4.183159 -0.679905   |
| H 6.618325 1.529350 0.655060    | H 6.618325 1.529350 0.655060    |
| H 7.586111 2.630043 -0.365385   | H 7.586111 2.630043 -0.365385   |
| H 8.487604 0.381911 -0.616330   | H 8.487604 0.381911 -0.616330   |
| H 7.695684 0.872149 -2.142756   | H 7.695684 0.872149 -2.142756   |
| H 8.108279 -1.879816 -1.606468  | H 8.108279 -1.879816 -1.606468  |
| H 7.061016 -1.248310 -2.909046  | H 7.061016 -1.248310 -2.909046  |
| H 6.138967 -3.078813 -0.619010  | H 6.138967 -3.078813 -0.619010  |
| H 6.603116 -3.621365 -2.253764  | H 6.603116 -3.621365 -2.253764  |
| H 2.217298 2.577141 -3.352972   | H 2.217298 2.577141 -3.352972   |
| H 1.377447 3.705718 -2.251124   | H 1.377447 3.705718 -2.251124   |
| H -0.111875 1.873045 -2.564541  | H -0.111875 1.873045 -2.564541  |
| H 0.562163 1.730227 -0.919317   | H 0.562163 1.730227 -0.919317   |
| H 4.097725 -4.210001 -1.239433  | H 4.097725 -4.210001 -1.239433  |
| H 4.557704 -4.389814 -2.950582  | H 4.557704 -4.389814 -2.950582  |
| H 2.240188 -4.439584 -2.963118  | H 2.240188 -4.439584 -2.963118  |
| H 2.704458 -2.847783 -3.593689  | H 2.704458 -2.847783 -3.593689  |
| H -0.265450 -2.601489 -2.378649 | H -0.265450 -2.601489 -2.378649 |
| H 0.937364 -1.894176 -3.447046  | H 0.937364 -1.894176 -3.447046  |
| H 0.233623 -0.577805 -0.775821  | H 0.233623 -0.577805 -0.775821  |
| H -0.667525 -0.350006 -2.288857 | H -0.667525 -0.350006 -2.288857 |
| C 0.629180 2.308761 5.411056    | C 0.629180 2.308761 5.411056    |
| N 0.353730 2.855514 6.393076    | N 0.353730 2.855514 6.393076    |

| B3LYP/6-31*<br>E(0): -3747.93134422 |         |         | B3LYP/6-31*<br>E(0): -3747.95605008 |   |         |         |         |
|-------------------------------------|---------|---------|-------------------------------------|---|---------|---------|---------|
| C                                   | -0.2355 | -1.1416 | 2.3344                              | C | 0.7713  | 0.4204  | 1.9438  |
| C                                   | 0.2486  | -2.4910 | 2.8806                              | C | 0.0508  | 1.4896  | 2.7681  |
| C                                   | -0.7095 | -3.4767 | 2.1723                              | C | 0.7124  | 2.7836  | 2.2396  |
| C                                   | -1.8557 | -2.5464 | 1.7911                              | C | 1.9887  | 2.2319  | 1.6153  |
| N                                   | -1.4721 | -1.2352 | 1.8120                              | N | 1.9093  | 0.8858  | 1.4009  |
| C                                   | 0.5232  | 0.0526  | 2.4496                              | C | 0.2731  | -0.8980 | 1.8052  |
| C                                   | -3.1024 | -2.9673 | 1.3636                              | C | 3.0939  | 2.9889  | 1.2666  |
| C                                   | -4.1102 | -2.1707 | 0.7869                              | C | 4.2699  | 2.5237  | 0.6488  |
| C                                   | -5.2474 | -2.8958 | 0.3504                              | C | 5.2512  | 3.5234  | 0.4317  |
| C                                   | -6.1201 | -2.0177 | -0.2939                             | C | 6.3525  | 2.9422  | -0.1983 |
| C                                   | -5.4801 | -0.7362 | -0.2419                             | C | 6.0120  | 1.5592  | -0.3638 |
| N                                   | -4.2729 | -0.8827 | 0.4382                              | N | 4.7427  | 1.3597  | 0.1718  |
| C                                   | -5.8570 | 0.5024  | -0.7752                             | C | 6.7156  | 0.5015  | -0.9530 |
| C                                   | -5.0848 | 1.6650  | -0.6929                             | C | 6.2269  | -0.8034 | -1.0703 |
| C                                   | -5.4678 | 2.9783  | -1.2135                             | C | 6.9327  | -1.9184 | -1.7068 |
| C                                   | -4.4455 | 3.8258  | -0.8808                             | C | 6.0861  | -2.9900 | -1.6295 |
| C                                   | -3.4571 | 3.0106  | -0.1669                             | C | 4.8825  | -2.5092 | -0.9396 |
| N                                   | -3.8557 | 1.7214  | -0.0809                             | N | 4.9934  | -1.2001 | -0.6176 |
| C                                   | -2.2762 | 3.5352  | 0.3888                              | C | 3.7739  | -3.3250 | -0.6608 |
| C                                   | -1.2617 | 2.9155  | 1.1108                              | C | 2.5917  | -3.0408 | 0.0178  |
| C                                   | -0.1640 | 3.5922  | 1.7653                              | C | 1.5181  | -3.9794 | 0.2577  |
| C                                   | 0.6269  | 2.6384  | 2.3917                              | C | 0.5179  | -3.3281 | 0.9694  |
| C                                   | 0.0614  | 1.3421  | 2.0853                              | C | 0.9484  | -1.9594 | 1.1609  |
| N                                   | -1.0811 | 1.5702  | 1.3464                              | N | 2.1943  | -1.8495 | 0.5762  |
| C                                   | -5.0502 | -4.3095 | 0.6807                              | C | 4.7346  | 4.7957  | 0.9414  |
| C                                   | -3.6453 | -4.3972 | 1.3535                              | C | 3.3110  | 4.4845  | 1.5003  |
| C                                   | -0.0231 | 5.0469  | 1.7777                              | C | 1.5777  | -5.3786 | -0.1691 |
| C                                   | 1.1173  | 5.7491  | 1.8679                              | C | 0.5626  | -6.1248 | -0.6270 |
| C                                   | -0.0805 | -4.1737 | 0.9289                              | C | -0.1770 | 3.5547  | 1.2316  |
| C                                   | 0.0952  | -2.5589 | 4.4156                              | C | 0.2902  | 1.2844  | 4.2759  |
| C                                   | 0.0194  | -3.2558 | -0.2961                             | C | -0.5393 | 2.7456  | -0.0190 |
| C                                   | 1.7538  | 2.9375  | 3.3298                              | C | -0.7184 | -3.9764 | 1.5205  |
| C                                   | -4.3228 | 5.2949  | -1.1568                             | C | 6.3031  | -4.3905 | -2.1201 |
| C                                   | -6.7573 | 3.2977  | -1.9177                             | C | 8.3231  | -1.8598 | -2.2754 |
| C                                   | -7.4381 | -2.3407 | -0.9280                             | C | 7.6243  | 3.6122  | -0.6195 |
| C                                   | -7.9296 | 3.5762  | -0.9564                             | C | 9.4266  | -2.0007 | -1.2084 |
| C                                   | 0.9732  | -3.7476 | -1.3718                             | C | -1.5742 | 3.4455  | -0.8874 |
| O                                   | 1.6118  | -4.7823 | -1.2592                             | O | -2.0652 | 4.5203  | -0.5614 |
| H                                   | 1.2871  | -2.6971 | 2.6090                              | H | -1.0266 | 1.4891  | 2.5816  |
| H                                   | -1.0382 | -4.2610 | 2.8641                              | H | 0.9446  | 3.4716  | 3.0617  |
| H                                   | -2.1451 | 4.6050  | 0.2659                              | H | 3.8438  | -4.3440 | -1.0260 |
| H                                   | -0.6691 | -5.0603 | 0.6669                              | H | 0.3172  | 4.4861  | 0.9338  |
| H                                   | 0.9170  | -4.5385 | 1.1918                              | H | -1.0979 | 3.8545  | 1.7446  |
| H                                   | -0.9508 | -2.4052 | 4.7046                              | H | 1.3622  | 1.2930  | 4.5052  |
| H                                   | 0.4119  | -3.5401 | 4.7870                              | H | -0.1860 | 2.0885  | 4.8496  |
| H                                   | 0.6908  | -1.7975 | 4.9317                              | H | -0.1233 | 0.3325  | 4.6187  |
| H                                   | 0.3777  | -2.2652 | 0.0005                              | H | -0.9531 | 1.7681  | 0.2577  |
| H                                   | -0.9798 | -3.1023 | -0.7193                             | H | 0.3669  | 2.5356  | -0.6011 |
| H                                   | 2.7156  | 2.9427  | 2.8112                              | H | -1.6260 | -3.6829 | 0.9799  |
| H                                   | 1.5996  | 3.9189  | 3.7904                              | H | -0.6255 | -5.0638 | 1.4583  |
| H                                   | 1.8288  | 2.1764  | 4.1064                              | H | -0.8792 | -3.7010 | 2.5642  |
| H                                   | -5.1471 | 5.6551  | -1.7799                             | H | 7.2389  | -4.4779 | -2.6809 |
| H                                   | -4.3329 | 5.8859  | -0.2310                             | H | 6.3518  | -5.1100 | -1.2916 |
| H                                   | -3.3872 | 5.5362  | -1.6782                             | H | 5.4919  | -4.7208 | -2.7822 |
| H                                   | -6.6149 | 4.1703  | -2.5673                             | H | 8.4485  | -2.6515 | -3.0244 |
| H                                   | -7.0305 | 2.4705  | -2.5862                             | H | 8.4656  | -0.9141 | -2.8154 |
| H                                   | -8.2644 | -1.8170 | -0.4302                             | H | 8.4952  | 3.1865  | -0.1048 |
| H                                   | -7.4623 | -2.0494 | -1.9857                             | H | 7.8021  | 3.5039  | -1.6971 |

|   |         |         |         |   |         |         |         |
|---|---------|---------|---------|---|---------|---------|---------|
| H | -7.6298 | -3.4146 | -0.8631 | H | 7.5791  | 4.6787  | -0.3855 |
| H | -8.8487 | 3.7938  | -1.5132 | H | 10.4221 | -1.9425 | -1.6644 |
| H | -8.1201 | 2.7155  | -0.3062 | H | 9.3495  | -1.2098 | -0.4544 |
| H | -7.7095 | 4.4341  | -0.3118 | H | 9.3443  | -2.9611 | -0.6880 |
| H | -3.0249 | -5.0996 | 0.7830  | H | 2.5822  | 5.1222  | 0.9843  |
| H | 1.0999  | 6.8352  | 1.8812  | H | 0.7149  | -7.1637 | -0.9054 |
| H | 2.0924  | 5.2768  | 1.9281  | H | -0.4412 | -5.7295 | -0.7518 |
| H | -0.9527 | 5.6097  | 1.7002  | H | 2.5610  | -5.8454 | -0.1122 |
| O | -5.7880 | -5.2597 | 0.4814  | O | 5.2589  | 5.8969  | 0.9474  |
| H | -3.7519 | -4.8247 | 2.3593  | H | 3.2721  | 4.7658  | 2.5611  |
| H | -6.8132 | 0.5530  | -1.2863 | H | 7.7004  | 0.7213  | -1.3525 |
| H | -3.6691 | -0.0719 | 0.5815  | H | 4.3202  | 0.4307  | 0.1410  |
| H | -1.7143 | 0.8265  | 1.0764  | H | 2.7122  | -0.9784 | 0.5585  |
| N | 1.8412  | -0.0243 | 2.9733  | N | -0.9979 | -1.1732 | 2.3747  |
| C | 2.9948  | 0.0445  | 1.9903  | C | -2.0382 | -0.7968 | 1.6782  |
| O | 2.8964  | 0.9502  | 1.0619  | O | -2.1262 | -0.2171 | 0.5572  |
| C | 4.2791  | 0.1617  | 2.8772  | C | -3.3926 | -1.1967 | 2.3037  |
| F | 4.3564  | 1.3339  | 3.5241  | F | -3.8122 | -2.3935 | 1.8016  |
| F | 4.3373  | -0.8256 | 3.8118  | F | -3.3967 | -1.3002 | 3.6387  |
| F | 5.3872  | 0.0498  | 2.1106  | F | -4.3670 | -0.2964 | 1.9722  |
| H | 1.9641  | -0.8205 | 3.5898  | H | -1.0200 | -1.9651 | 4.2255  |
| K | 2.7772  | 0.0759  | -1.4588 | K | -4.1340 | 0.3061  | -1.0174 |
| O | 1.4200  | 2.4870  | -1.9240 | O | -3.8749 | -2.3146 | -2.0126 |
| C | 2.1171  | 3.7220  | -1.8188 | C | -4.9938 | -3.1774 | -2.1289 |
| C | 3.3178  | 3.5249  | -0.9182 | C | -5.8945 | -2.9460 | -0.9333 |
| O | 4.2311  | 2.6626  | -1.5885 | O | -6.3949 | -1.6175 | -1.0108 |
| C | 5.3862  | 2.3558  | -0.8176 | C | -7.1835 | -1.2326 | 0.1078  |
| C | 6.2350  | 1.3942  | -1.6227 | C | -7.8172 | 0.1037  | -0.2160 |
| O | 5.5435  | 0.1577  | -1.7316 | O | -6.7977 | 1.0841  | -0.3650 |
| C | 6.1730  | -0.7761 | -2.5904 | C | -7.2675 | 2.2696  | -0.9872 |
| C | 5.5088  | -2.1279 | -2.4388 | C | -6.1667 | 3.3065  | -1.0342 |
| O | 4.1662  | -2.0849 | -2.9088 | O | -5.0793 | 2.8535  | -1.8357 |
| C | 0.3706  | 2.4987  | -2.8733 | C | -2.8959 | -2.4880 | -3.0262 |
| C | -0.5261 | 1.3049  | -2.6327 | C | -1.6751 | -1.6661 | -2.6738 |
| O | 0.1858  | 0.0863  | -2.8538 | O | -1.9612 | -0.2751 | -2.8060 |
| C | 3.5984  | -3.3989 | -2.9049 | C | -4.2721 | 3.9577  | -2.2610 |
| C | 2.1709  | -3.3808 | -3.4385 | C | -2.9668 | 3.4998  | -2.9002 |
| N | 1.1523  | -2.8952 | -2.4830 | N | -2.0046 | 2.7745  | -2.0429 |
| C | -0.0617 | -2.3291 | -3.1196 | C | -1.0178 | 1.9655  | -2.8017 |
| C | -0.6518 | -1.0312 | -2.5751 | C | -0.8301 | 0.5048  | -2.4079 |
| H | 1.4579  | 4.4920  | -1.3897 | H | -4.6694 | -4.2301 | -2.1414 |
| H | 2.4492  | 4.0578  | -2.8140 | H | -5.5439 | -2.9759 | -3.0619 |
| H | 3.0096  | 3.0782  | 0.0356  | H | -5.3246 | -3.0884 | -0.0054 |
| H | 3.7860  | 4.5048  | -0.7265 | H | -6.7238 | -3.6713 | -0.9514 |
| H | 5.0957  | 1.9012  | 0.1387  | H | -6.5609 | -1.1614 | 1.0108  |
| H | 5.9706  | 3.2695  | -0.6177 | H | -7.9819 | -1.9685 | 0.2934  |
| H | 7.2043  | 1.2439  | -1.1213 | H | -8.5122 | 0.3934  | 0.5877  |
| H | 6.4244  | 1.8140  | -2.6233 | H | -8.3898 | 0.0120  | -1.1515 |
| H | 7.2372  | -0.8848 | -2.3251 | H | -8.1151 | 2.6905  | -0.4225 |
| H | 6.1157  | -0.4344 | -3.6367 | H | -7.6155 | 2.0454  | -2.0081 |
| H | 5.5304  | -2.4369 | -1.3834 | H | -5.8155 | 3.5405  | -0.0179 |
| H | 6.0869  | -2.8625 | -3.0236 | H | -6.5962 | 4.2250  | -1.4627 |
| H | 0.7772  | 2.4832  | -3.8979 | H | -3.2964 | -2.1848 | -4.0067 |
| H | -0.2434 | 3.4061  | -2.7626 | H | -2.5992 | -3.5469 | -3.0899 |
| H | -1.3870 | 1.3612  | -3.3175 | H | -0.8527 | -1.9427 | -3.3528 |
| H | -0.9099 | 1.3392  | -1.6041 | H | -1.3650 | -1.8904 | -1.6440 |
| H | 3.6354  | -3.8226 | -1.8980 | H | -4.0656 | 4.6183  | -1.4182 |
| H | 4.1942  | -4.0437 | -3.5716 | H | -4.8239 | 4.5256  | -3.0281 |
| H | 1.9268  | -4.4013 | -3.7646 | H | -2.4982 | 4.4039  | -3.3189 |
| H | 2.1451  | -2.7259 | -4.3138 | H | -3.2099 | 2.8352  | -3.7345 |
| H | -0.8722 | -3.0728 | -3.1193 | H | -0.0321 | 2.4462  | -2.7616 |

|   |         |         |         |   |         |         |         |
|---|---------|---------|---------|---|---------|---------|---------|
| H | 0.1848  | -2.1456 | -4.1686 | H | -1.3240 | 1.9835  | -3.8512 |
| H | -0.8623 | -1.0775 | -1.5003 | H | -0.6592 | 0.3701  | -1.3358 |
| H | -1.6191 | -0.8965 | -3.0864 | H | 0.0621  | 0.1449  | -2.9456 |
| C | 3.1301  | -1.3510 | 1.3035  | C | -0.9665 | -2.4181 | 5.2186  |
| N | 3.1554  | -2.2625 | 0.5771  | N | -0.9165 | -2.9017 | 6.2704  |

| <b>4' with KF</b>                                                              | <b>4'' with KF</b>                                                             |
|--------------------------------------------------------------------------------|--------------------------------------------------------------------------------|
| TPSS-D3/def2-SVP<br>E(0): -3753.380169<br>Chem.pot. (298.15 K): 2295.88 kJ/mol | TPSS-D3/def2-SVP<br>E(0): -3753.390597<br>Chem.pot. (298.15 K): 2283.89 kJ/mol |
| C -0.250416 -1.025333 2.558842                                                 | C -0.655465 -0.493981 2.275528                                                 |
| C 0.250164 -2.347083 3.141588                                                  | C 0.005027 -1.556956 3.152680                                                  |
| C -0.742494 -3.363397 2.524890                                                 | C -0.704398 -2.839831 2.653968                                                 |
| C -1.856566 -2.441541 2.023692                                                 | C -1.950944 -2.255894 1.994830                                                 |
| N -1.478951 -1.126998 2.013694                                                 | N -1.810709 -0.923178 1.724179                                                 |
| C 0.528573 0.157987 2.611204                                                   | C -0.104201 0.801356 2.121515                                                  |
| C -3.059591 -2.873418 1.469950                                                 | C -3.066134 -2.989514 1.597018                                                 |
| C -3.962792 -2.094120 0.712591                                                 | C -4.146932 -2.518972 0.820405                                                 |
| C -5.032973 -2.848931 0.146465                                                 | C -5.128249 -3.515541 0.538560                                                 |
| C -5.793999 -2.005714 -0.680293                                                | C -6.117601 -2.954046 -0.284878                                                |
| C -5.154067 -0.718965 -0.598880                                                | C -5.702828 -1.589880 -0.495904                                                |
| N -4.059563 -0.821832 0.266194                                                 | N -4.511694 -1.375787 0.202000                                                 |
| C -5.447312 0.492963 -1.249412                                                 | C -6.274841 -0.561889 -1.266033                                                |
| C -4.696445 1.672257 -1.094232                                                 | C -5.710885 0.720861 -1.405050                                                 |
| C -4.978969 2.947799 -1.761470                                                 | C -6.273385 1.806391 -2.217379                                                 |
| C -4.018354 3.830039 -1.311132                                                 | C -5.405333 2.868877 -2.078854                                                 |
| C -3.164431 3.066489 -0.389549                                                 | C -4.331412 2.403308 -1.185966                                                 |
| N -3.588019 1.775177 -0.277761                                                 | N -4.536735 1.113066 -0.796888                                                 |
| C -2.051113 3.627291 0.271210                                                  | C -3.249504 3.220910 -0.797544                                                 |
| C -1.102980 3.025013 1.103704                                                  | C -2.172432 2.955223 0.056962                                                  |
| C 0.012329 3.693272 1.752312                                                   | C -1.107569 3.884890 0.397151                                                  |
| C 0.760072 2.723502 2.432587                                                   | C -0.219228 3.229216 1.261687                                                  |
| C 0.124372 1.448301 2.183594                                                   | C -0.710418 1.878518 1.426629                                                  |
| N -1.001594 1.687766 1.423263                                                  | N -1.889278 1.775441 0.711734                                                  |
| C -4.898442 -4.242360 0.579605                                                 | C -4.713743 -4.766547 1.181661                                                 |
| C -3.608513 -4.298644 1.449960                                                 | C -3.356541 -4.461352 1.883225                                                 |
| C 0.228466 5.136623 1.676118                                                   | C -1.052852 5.254911 -0.112805                                                 |
| C 1.398614 5.799505 1.822048                                                   | C 0.052592 6.003222 -0.329114                                                  |
| C -0.091195 -4.166893 1.362202                                                 | C 0.153657 -3.622966 1.618826                                                  |
| C 0.217470 -2.345138 4.684891                                                  | C -0.240553 -1.245102 4.644527                                                 |
| C 0.094721 -3.286742 0.124156                                                  | C 0.417629 -2.796268 0.357295                                                  |
| C 1.924652 2.978521 3.342281                                                   | C 0.970207 3.832982 1.950447                                                   |
| C -3.836504 5.277434 -1.666554                                                 | C -5.502705 4.240063 -2.682777                                                 |
| C -6.134939 3.215682 -2.687599                                                 | C -7.572423 1.749667 -2.975581                                                 |
| C -7.000334 -2.357186 -1.497811                                                | C -7.339638 -3.615976 -0.845994                                                |
| C -7.446031 3.534902 -1.937592                                                 | C -8.804334 1.999818 -2.079428                                                 |
| C 1.126630 -3.771203 -0.873071                                                 | C 1.407921 -3.423539 -0.604183                                                 |
| O 1.934765 -4.661040 -0.598364                                                 | O 1.996401 -4.475751 -0.336172                                                 |
| H 1.276032 -2.539295 2.778551                                                  | H 1.091909 -1.611144 2.975411                                                  |
| H -1.115588 -4.074805 3.282018                                                 | H -0.960176 -3.520557 3.484197                                                 |
| H -1.888735 4.694463 0.096017                                                  | H -3.246302 4.227360 -1.225596                                                 |
| H -0.706678 -5.047922 1.108151                                                 | H -0.346824 -4.570309 1.350569                                                 |
| H 0.886375 -4.550851 1.699978                                                  | H 1.113372 -3.897610 2.091224                                                  |
| H -0.810148 -2.166723 5.047647                                                 | H -1.323808 -1.223498 4.860995                                                 |
| H 0.562426 -3.318539 5.074647                                                  | H 0.225359 -2.019468 5.279275                                                  |
| H 0.863413 -1.557579 5.113151                                                  | H 0.187773 -0.264063 4.910448                                                  |
| H 0.460686 -2.287098 0.426844                                                  | H 0.834117 -1.807566 0.628570                                                  |
| H -0.882025 -3.139208 -0.360802                                                | H -0.537780 -2.601773 -0.163662                                                |



|                                 |                                 |
|---------------------------------|---------------------------------|
| H 2.874075 2.971390 2.778264    | H 1.908933 3.569120 1.429954    |
| H 1.815606 3.961780 3.831404    | H 0.881407 4.931493 1.964971    |
| H 2.008533 2.190197 4.104148    | H 1.058091 3.462245 2.982081    |
| H -4.573051 5.601108 -2.420241  | H -6.371704 4.320010 -3.356486  |
| H -3.955296 5.929896 -0.781138  | H -5.611671 5.017711 -1.903419  |
| H -2.827017 5.471122 -2.075509  | H -4.598066 4.493166 -3.266578  |
| H -5.883181 4.060806 -3.353870  | H -7.556435 2.498639 -3.788030  |
| H -6.295680 2.342535 -3.347465  | H -7.674763 0.764693 -3.468707  |
| H -7.886337 -1.781958 -1.170955 | H -8.261861 -3.120669 -0.490021 |
| H -6.842387 -2.128527 -2.567715 | H -7.351445 -3.567592 -1.950330 |
| H -7.225196 -3.430052 -1.396459 | H -7.370682 -4.672897 -0.539866 |
| H -8.272371 3.717538 -2.647619  | H -9.737807 1.942855 -2.667406  |
| H -7.736503 2.698558 -1.277360  | H -8.861385 1.252148 -1.268446  |
| H -7.324978 4.433459 -1.307176  | H -8.749199 2.998567 -1.611495  |
| H -2.910810 -5.029916 1.001628  | H -2.585375 -5.145600 1.482698  |
| H 1.431192 6.892103 1.746113    | H -0.032474 7.026067 -0.712622  |
| H 2.349461 5.287508 1.998098    | H 1.064629 5.626104 -0.148210   |
| H -0.666697 5.736289 1.460598   | H -2.023494 5.706237 -0.361104  |
| O -5.614996 -5.207965 0.324816  | O -5.275723 -5.859273 1.188091  |
| H -3.856709 -4.680686 2.458483  | H -3.441702 -4.682501 2.964182  |
| H -6.311637 0.507371 -1.919564  | H -7.205808 -0.785189 -1.794996 |
| H -3.482966 0.019656 0.443062   | H -4.062308 -0.443279 0.144126  |
| H -1.643356 0.946283 1.135113   | H -2.421393 0.902286 0.659477   |
| N 1.882166 0.021472 3.015483    | N 1.179634 1.022506 2.674818    |
| C 2.845542 0.114697 1.946690    | C 2.205573 0.485322 2.040574    |
| O 2.830867 1.069971 1.148219    | O 2.229576 -0.207454 0.991845   |
| C 4.229616 -0.390825 2.418364   | C 3.558543 0.763535 2.743707    |
| F 4.834343 0.570873 3.171954    | F 3.754338 2.081928 3.000352    |
| F 4.166993 -1.508046 3.195049   | F 3.663221 0.102418 3.918987    |
| F 5.046466 -0.649952 1.381186   | F 4.601287 0.360405 1.962843    |
| H 2.042784 -0.826757 3.559053   | H 1.237993 1.664487 4.043357    |
| K 2.422027 -0.000517 -1.240304  | K 3.815578 -0.184750 -1.084581  |
| O 0.731858 2.334610 -1.668600   | O 2.973923 2.558367 -1.134533   |
| C 1.295617 3.645447 -1.671494   | C 3.960454 3.586655 -1.173273   |
| C 2.569251 3.636080 -0.853840   | C 5.129342 3.170560 -0.302906   |
| O 3.530305 2.847365 -1.554907   | O 5.723050 2.014618 -0.893874   |
| C 4.785498 2.743178 -0.886525   | C 6.912249 1.565834 -0.244728   |
| C 5.687197 1.863109 -1.728446   | C 7.508644 0.455426 -1.086129   |
| O 5.159580 0.539918 -1.726818   | O 6.614193 -0.658442 -1.097220  |
| C 5.896546 -0.376826 -2.524436  | C 7.009344 -1.677240 -2.014346  |
| C 5.430482 -1.785200 -2.218517  | C 6.104814 -2.881851 -1.861378  |
| O 4.075548 -1.965930 -2.639320  | O 4.767124 -2.561350 -2.256360  |
| C -0.309410 2.176934 -2.624499  | C 1.894709 2.770632 -2.045858   |
| C -1.028022 0.872235 -2.370634  | C 0.825412 1.732120 -1.795078   |
| O -0.154206 -0.244525 -2.589214 | O 1.259584 0.427520 -2.200719   |
| C 3.690468 -3.340357 -2.518583  | C 3.966491 -3.749507 -2.339505  |
| C 2.260805 -3.557266 -3.003412  | C 2.535086 -3.440031 -2.766510  |
| N 1.191696 -3.083266 -2.092325  | N 1.670571 -2.729881 -1.791650  |
| C -0.067488 -2.688100 -2.783459 | C 0.590920 -1.915283 -2.416716  |
| C -0.851276 -1.459581 -2.323449 | C 0.263718 -0.537175 -1.844234  |
| H 0.577204 4.369987 -1.235832   | H 3.540456 4.543632 -0.798916   |
| H 1.526896 3.960753 -2.710498   | H 4.313106 3.745943 -2.213531   |
| H 2.374806 3.210198 0.148481    | H 4.788211 2.952078 0.728763    |
| H 2.930457 4.679909 -0.736331   | H 5.861287 4.003395 -0.256511   |
| H 4.648528 2.295519 0.117546    | H 6.686775 1.203677 0.778349    |
| H 5.254720 3.744816 -0.777264   | H 7.649959 2.391307 -0.166612   |
| H 6.713591 1.869914 -1.304291   | H 8.491902 0.157609 -0.666427   |
| H 5.738562 2.259369 -2.764942   | H 7.670199 0.825971 -2.119705   |
| H 6.980415 -0.313511 -2.291083  | H 8.052259 -1.997928 -1.811083  |
| H 5.764934 -0.151903 -3.604653  | H 6.964360 -1.295219 -3.056271  |
| H 5.521193 -1.979348 -1.129796  | H 6.118718 -3.237005 -0.809823  |

|                                 |                                 |
|---------------------------------|---------------------------------|
| H 6.091059 -2.498882 -2.754497  | H 6.503684 -3.695651 -2.501715  |
| H 0.104170 2.203149 -3.655638   | H 2.257883 2.720656 -3.094186   |
| H -1.054594 2.993893 -2.529789  | H 1.444205 3.771270 -1.884302   |
| H -1.900268 0.805395 -3.054045  | H -0.090186 2.015266 -2.354799  |
| H -1.418896 0.857860 -1.335546  | H 0.582086 1.722671 -0.717264   |
| H 3.809714 -3.681714 -1.475532  | H 3.978902 -4.285874 -1.376224  |
| H 4.353956 -3.961933 -3.157117  | H 4.395117 -4.420263 -3.114093  |
| H 2.137437 -4.641819 -3.189929  | H 2.070868 -4.409795 -3.034603  |
| H 2.136979 -3.027791 -3.961251  | H 2.571070 -2.820521 -3.676765  |
| H -0.776818 -3.538929 -2.777388 | H -0.350037 -2.498256 -2.428786 |
| H 0.204530 -2.512965 -3.835765  | H 0.880372 -1.765035 -3.468557  |
| H -1.134050 -1.496987 -1.255118 | H 0.134399 -0.539919 -0.748064  |
| H -1.799227 -1.475936 -2.903051 | H -0.709078 -0.238044 -2.289506 |
| F 2.474221 -1.352496 1.049607   | F 1.167838 2.098002 4.949074    |
| <b>TPSS-D3/def2-TZVP</b>        | <b>TPSS-D3/def2-TZVP</b>        |
| <b>E(0): -3756.877605</b>       | <b>E(0): -3756.895738</b>       |
| C -0.253633 -0.986232 2.518177  | C -0.689895 -0.514091 2.259450  |
| C 0.236186 -2.301749 3.110627   | C -0.044347 -1.589703 3.125679  |
| C -0.746918 -3.323580 2.495067  | C -0.740928 -2.865034 2.601159  |
| C -1.837667 -2.410507 1.946068  | C -1.966756 -2.278828 1.919742  |
| N -1.465226 -1.094103 1.945161  | N -1.827580 -0.941919 1.675701  |
| C 0.502955 0.202784 2.597458    | C -0.146392 0.780106 2.128751   |
| C -3.020149 -2.840353 1.369772  | C -3.072184 -3.003362 1.507821  |
| C -3.922156 -2.061587 0.623273  | C -4.161637 -2.524086 0.762674  |
| C -4.980018 -2.805842 0.035475  | C -5.150535 -3.504834 0.480962  |
| C -5.741627 -1.946886 -0.768779 | C -6.152729 -2.918587 -0.302733 |
| C -5.118363 -0.664174 -0.651812 | C -5.740707 -1.559355 -0.491733 |
| N -4.027706 -0.783032 0.213070  | N -4.533928 -1.368526 0.182841  |
| C -5.419424 0.558601 -1.263599  | C -6.320472 -0.515759 -1.222433 |
| C -4.691881 1.736866 -1.074760  | C -5.757738 0.758757 -1.350591  |
| C -4.994394 3.022792 -1.699424  | C -6.324852 1.856987 -2.131030  |
| C -4.053299 3.902520 -1.229643  | C -5.447824 2.902792 -2.005020  |
| C -3.187296 3.134086 -0.333760  | C -4.361284 2.423779 -1.146063  |
| N -3.585379 1.835633 -0.256177  | N -4.567929 1.134856 -0.763224  |
| C -2.087292 3.689167 0.339705   | C -3.263617 3.217493 -0.780085  |
| C -1.141452 3.078258 1.154540   | C -2.180312 2.934305 0.047810   |
| C -0.032284 3.734636 1.810175   | C -1.099823 3.842850 0.361986   |
| C 0.715096 2.764940 2.472487    | C -0.213439 3.188271 1.215564   |
| C 0.094241 1.492004 2.203585    | C -0.720306 1.851675 1.412800   |
| N -1.032278 1.738772 1.450132   | N -1.903403 1.757974 0.705474   |
| C -4.833146 -4.199130 0.436547  | C -4.725169 -4.761743 1.086059  |
| C -3.551923 -4.267938 1.312034  | C -3.355460 -4.479462 1.763743  |
| C 0.178029 5.174792 1.760215    | C -1.040140 5.204931 -0.154716  |
| C 1.352198 5.819232 1.868775    | C 0.062739 5.923640 -0.423394   |
| C -0.069942 -4.176571 1.385189  | C 0.144570 -3.650040 1.597247   |
| C 0.166052 -2.291830 4.652025   | C -0.326284 -1.331142 4.618707  |
| C 0.092874 -3.366236 0.099335   | C 0.450222 -2.819577 0.350950   |
| C 1.856299 3.022000 3.406205    | C 0.999175 3.797504 1.849748    |
| C -3.902993 5.360473 -1.541124  | C -5.548775 4.277819 -2.591906  |
| C -6.149735 3.296790 -2.617506  | C -7.635106 1.820632 -2.862095  |
| C -6.954371 -2.271130 -1.581510 | C -7.402514 -3.544614 -0.834470 |
| C -7.456281 3.597972 -1.853630  | C -8.838347 2.100539 -1.937466  |
| C 1.161684 -3.853179 -0.853161  | C 1.461326 -3.452395 -0.581153  |
| O 1.967273 -4.733508 -0.547034  | O 2.044515 -4.501384 -0.293545  |
| H 1.258840 -2.503154 2.772416   | H 1.037059 -1.638622 2.968876   |
| H -1.143783 -3.998488 3.261571  | H -1.017167 -3.539493 3.418876  |
| H -1.934723 4.753423 0.189217   | H -3.253687 4.217416 -1.202782  |
| H -0.655603 -5.079726 1.185913  | H -0.349888 -4.584341 1.311191  |
| H 0.907388 -4.506143 1.749507   | H 1.077728 -3.925494 2.100037   |
| H -0.864438 -2.123876 4.983916  | H -1.406277 -1.306208 4.803797  |

|                                 |                                 |
|---------------------------------|---------------------------------|
| H 0.507033 -3.254214 5.047287   | H 0.110023 -2.132901 5.224517   |
| H 0.787177 -1.504804 5.094831   | H 0.102820 -0.378282 4.939961   |
| H 0.384124 -2.336994 0.346011   | H 0.857912 -1.841877 0.639248   |
| H -0.871757 -3.316442 -0.412522 | H -0.480872 -2.619992 -0.193254 |
| H 2.817571 2.984217 2.882436    | H 1.914776 3.494002 1.326910    |
| H 1.749581 4.015236 3.853937    | H 0.930145 4.887855 1.806988    |
| H 1.890175 2.270903 4.197260    | H 1.104479 3.492044 2.890874    |
| H -4.629285 5.680332 -2.293701  | H -6.413398 4.360337 -3.256628  |
| H -4.056263 5.978367 -0.647062  | H -5.657597 5.039118 -1.808734  |
| H -2.899925 5.588780 -1.923006  | H -4.653178 4.535124 -3.171098  |
| H -5.908437 4.147418 -3.265800  | H -7.623854 2.560087 -3.671385  |
| H -6.309938 2.438150 -3.281725  | H -7.767995 0.841746 -3.339998  |
| H -7.869370 -2.061678 -1.012066 | H -8.263428 -3.289777 -0.202671 |
| H -6.994528 -1.675995 -2.499290 | H -7.625694 -3.195337 -1.848023 |
| H -6.965803 -3.331479 -1.845840 | H -7.309459 -4.633053 -0.847615 |
| H -8.280218 3.784638 -2.551362  | H -9.778204 2.057993 -2.499103  |
| H -7.733242 2.756298 -1.209892  | H -8.886728 1.364202 -1.128086  |
| H -7.333994 4.481315 -1.217804  | H -8.750670 3.093457 -1.483589  |
| H -2.849515 -4.971459 0.849327  | H -2.602087 -5.146246 1.327019  |
| H 1.394169 6.903357 1.820450    | H -0.016951 6.937740 -0.803508  |
| H 2.296244 5.297400 1.986914    | H 1.065132 5.530003 -0.289963   |
| H -0.716201 5.777139 1.602069   | H -2.003663 5.672396 -0.356224  |
| O -5.537386 -5.167917 0.158011  | O -5.286924 -5.855325 1.084921  |
| H -3.801976 -4.672905 2.300648  | H -3.418101 -4.724401 2.831443  |
| H -6.275491 0.584092 -1.930298  | H -7.256977 -0.720473 -1.731347 |
| H -3.455494 0.042252 0.420637   | H -4.076143 -0.449656 0.143400  |
| H -1.660751 1.005729 1.137275   | H -2.443149 0.897462 0.660769   |
| N 1.848933 0.061270 3.040913    | N 1.108466 1.017081 2.758686    |
| C 2.866005 0.201053 2.073978    | C 2.167341 0.518460 2.154837    |
| O 2.884405 1.097814 1.229195    | O 2.248128 -0.144927 1.092778   |
| C 4.220746 -0.355337 2.579527   | C 3.497730 0.791856 2.911030    |
| F 4.815321 0.587219 3.384196    | F 3.632003 2.079048 3.317653    |
| F 4.117154 -1.481098 3.337270   | F 3.620284 0.005126 4.013898    |
| F 5.076057 -0.598688 1.573876   | F 4.574156 0.521880 2.116889    |
| H 1.993009 -0.770338 3.603503   | H 1.084515 1.665679 4.099139    |
| K 2.445071 -0.105116 -1.152657  | K 3.845873 -0.190292 -0.994441  |
| O 0.712557 2.226766 -1.663896   | O 2.985629 2.545996 -1.219536   |
| C 1.249148 3.554642 -1.725616   | C 3.962754 3.590126 -1.297959   |
| C 2.544700 3.592325 -0.950453   | C 5.132008 3.217362 -0.414704   |
| O 3.498863 2.794215 -1.664371   | O 5.754042 2.057740 -0.986243   |
| C 4.781592 2.750443 -1.026425   | C 6.942823 1.647871 -0.296293   |
| C 5.676746 1.859580 -1.857570   | C 7.560649 0.514517 -1.083011   |
| O 5.198094 0.513497 -1.756804   | O 6.681009 -0.620531 -1.040038  |
| C 5.909720 -0.390564 -2.604966  | C 7.087669 -1.644280 -1.958960  |
| C 5.484711 -1.804481 -2.283410  | C 6.195179 -2.852115 -1.799493  |
| O 4.119848 -2.017495 -2.681179  | O 4.854458 -2.546984 -2.223914  |
| C -0.365957 2.044052 -2.583566  | C 1.913214 2.721844 -2.156091   |
| C -1.029675 0.718114 -2.311842  | C 0.856814 1.680154 -1.884338   |
| O -0.132228 -0.371260 -2.606689 | O 1.318999 0.368995 -2.265538   |
| C 3.755232 -3.392444 -2.447960  | C 4.068150 -3.756809 -2.248888  |
| C 2.345324 -3.666749 -2.953612  | C 2.642242 -3.484908 -2.708674  |
| N 1.253103 -3.182171 -2.073746  | N 1.751453 -2.767835 -1.759847  |
| C 0.006275 -2.813916 -2.806139  | C 0.668844 -1.982631 -2.423216  |
| C -0.817322 -1.607199 -2.370094 | C 0.323130 -0.598152 -1.887736  |
| H 0.532270 4.265894 -1.288988   | H 3.528513 4.542385 -0.956538   |
| H 1.433612 3.835195 -2.773945   | H 4.303768 3.712822 -2.336912   |
| H 2.399316 3.193368 0.061792    | H 4.793768 3.003694 0.609837    |
| H 2.894932 4.634273 -0.880559   | H 5.845846 4.053845 -0.381135   |
| H 4.680337 2.351161 -0.007890   | H 6.700431 1.329916 0.728062    |
| H 5.217271 3.761336 -0.978424   | H 7.659181 2.481545 -0.243831   |
| H 6.711047 1.918942 -1.484102   | H 8.536797 0.248910 -0.650455   |

|                                                      |                                                      |
|------------------------------------------------------|------------------------------------------------------|
| H 5.663784 2.187562 -2.908701                        | H 7.710761 0.828594 -2.126578                        |
| H 6.993261 -0.304661 -2.425981                       | H 8.124768 -1.947981 -1.749366                       |
| H 5.712033 -0.155683 -3.662615                       | H 7.037743 -1.261042 -2.989530                       |
| H 5.592628 -1.992695 -1.204625                       | H 6.186288 -3.187086 -0.751483                       |
| H 6.139175 -2.503741 -2.827101                       | H 6.600754 -3.665974 -2.419572                       |
| H 0.008231 2.091697 -3.618256                        | H 2.294787 2.643148 -3.185503                        |
| H -1.121092 2.833467 -2.446847                       | H 1.458661 3.715414 -2.027488                        |
| H -1.928926 0.633237 -2.940933                       | H -0.051000 1.927629 -2.454920                       |
| H -1.347171 0.665582 -1.262440                       | H 0.610376 1.680892 -0.815699                        |
| H 3.852685 -3.625013 -1.383038                       | H 4.086937 -4.229633 -1.263717                       |
| H 4.445098 -4.041926 -3.009361                       | H 4.515305 -4.450177 -2.978311                       |
| H 2.247371 -4.750614 -3.099603                       | H 2.199173 -4.458979 -2.958120                       |
| H 2.225091 -3.177583 -3.923170                       | H 2.681807 -2.886605 -3.622285                       |
| H -0.678056 -3.674002 -2.814758                      | H -0.256201 -2.573657 -2.423463                      |
| H 0.307270 -2.638769 -3.841167                       | H 0.967551 -1.863896 -3.467153                       |
| H -1.126511 -1.649205 -1.319571                      | H 0.197968 -0.572155 -0.800482                       |
| H -1.734876 -1.634210 -2.980794                      | H -0.638784 -0.316693 -2.345066                      |
| F 2.528025 -1.446056 1.066845                        | F 0.994722 2.109643 5.016583                         |
| <b>PBE-D3/def2-TZVP</b><br><b>E(0): -3752.411778</b> | <b>PBE-D3/def2-TZVP</b><br><b>E(0): -3752.430787</b> |
| C -0.259572 -0.988594 2.508357                       | C -0.677176 -0.529668 2.256592                       |
| C 0.241273 -2.309285 3.079131                        | C -0.039131 -1.617028 3.112528                       |
| C -0.745746 -3.325420 2.463948                       | C -0.740881 -2.882244 2.574693                       |
| C -1.847280 -2.410731 1.943301                       | C -1.966124 -2.282972 1.904911                       |
| N -1.478522 -1.094585 1.949053                       | N -1.820739 -0.945349 1.673684                       |
| C 0.500533 0.201663 2.582658                         | C -0.117251 0.760434 2.126243                        |
| C -3.042610 -2.842402 1.388006                       | C -3.080609 -3.001009 1.497048                       |
| C -3.956154 -2.063320 0.653295                       | C -4.175276 -2.510762 0.763702                       |
| C -5.025710 -2.812327 0.087049                       | C -5.171457 -3.489385 0.487594                       |
| C -5.796924 -1.957723 -0.714395                      | C -6.179725 -2.895447 -0.284380                      |
| C -5.165803 -0.673988 -0.616108                      | C -5.761412 -1.534975 -0.471309                      |
| N -4.065444 -0.787939 0.233887                       | N -4.549426 -1.351509 0.192311                       |
| C -5.468962 0.545317 -1.235121                       | C -6.341104 -0.485203 -1.194665                      |
| C -4.731671 1.722594 -1.060989                       | C -5.766755 0.786463 -1.322282                       |
| C -5.038820 3.007457 -1.687242                       | C -6.328151 1.891987 -2.097790                       |
| C -4.089287 3.888518 -1.228413                       | C -5.437101 2.930284 -1.975387                       |
| C -3.216578 3.119522 -0.337914                       | C -4.350613 2.436869 -1.122779                       |
| N -3.616742 1.821065 -0.255237                       | N -4.570407 1.149146 -0.741642                       |
| C -2.114845 3.677971 0.331474                        | C -3.242038 3.219168 -0.762783                       |
| C -1.164040 3.072989 1.148512                        | C -2.153678 2.929004 0.058993                        |
| C -0.060104 3.738512 1.806354                        | C -1.064473 3.833074 0.361624                        |
| C 0.694087 2.770148 2.470060                         | C -0.173908 3.172692 1.211436                        |
| C 0.080889 1.493487 2.195748                         | C -0.690182 1.838983 1.413284                        |
| N -1.045875 1.734583 1.442217                        | N -1.879580 1.753071 0.717016                        |
| C -4.873373 -4.204662 0.495999                       | C -4.743443 -4.751812 1.083504                       |
| C -3.578190 -4.266132 1.347482                       | C -3.368217 -4.474239 1.747110                       |
| C 0.138881 5.178584 1.760587                         | C -0.998637 5.192108 -0.157060                       |
| C 1.305395 5.839161 1.885994                         | C 0.107744 5.907526 -0.432449                        |
| C -0.086896 -4.168057 1.340835                       | C 0.135475 -3.670721 1.570162                        |
| C 0.202275 -2.322167 4.617383                        | C -0.314270 -1.370058 4.604973                       |
| C 0.106997 -3.348234 0.068961                        | C 0.451381 -2.860241 0.316063                        |
| C 1.829142 3.030759 3.403544                         | C 1.039594 3.775262 1.840130                         |
| C -3.941705 5.341642 -1.544515                       | C -5.527646 4.302986 -2.559141                       |
| C -6.200144 3.282379 -2.592603                       | C -7.639779 1.872751 -2.820784                       |
| C -7.017128 -2.284515 -1.506661                      | C -7.432510 -3.512417 -0.807600                      |
| C -7.493153 3.612479 -1.826126                       | C -8.833830 2.193017 -1.904367                       |
| C 1.155239 -3.857180 -0.892080                       | C 1.477346 -3.495426 -0.596151                       |
| O 1.939242 -4.760450 -0.593494                       | O 2.062427 -4.538918 -0.290591                       |

|                                 |                                 |
|---------------------------------|---------------------------------|
| H 1.262901 -2.504262 2.714924   | H 1.047016 -1.672981 2.953743   |
| H -1.132105 -4.012122 3.233285  | H -1.021844 -3.563175 3.392845  |
| H -1.966593 4.747489 0.177771   | H -3.226415 4.222928 -1.188950  |
| H -0.692765 -5.060421 1.124570  | H -0.364843 -4.610541 1.291874  |
| H 0.883982 -4.533000 1.705119   | H 1.070380 -3.955666 2.075701   |
| H -0.824644 -2.160131 4.977883  | H -1.397287 -1.338691 4.798827  |
| H 0.552375 -3.293191 4.995799   | H 0.119478 -2.181497 5.207777   |
| H 0.832617 -1.540591 5.067979   | H 0.122883 -0.419145 4.938386   |
| H 0.450291 -2.331557 0.329211   | H 0.852535 -1.870184 0.592004   |
| H -0.859542 -3.242265 -0.440232 | H -0.477958 -2.668362 -0.243798 |
| H 2.797107 3.009382 2.880173    | H 1.958427 3.472906 1.311723    |
| H 1.716398 4.022588 3.863326    | H 0.976960 4.870629 1.802705    |
| H 1.876571 2.270810 4.191999    | H 1.153661 3.464065 2.884130    |
| H -4.663511 5.659461 -2.308923  | H -6.384191 4.390827 -3.241045  |
| H -4.106758 5.969781 -0.653999  | H -5.649973 5.069200 -1.776251  |
| H -2.932712 5.577407 -1.919104  | H -4.620621 4.566332 -3.126177  |
| H -5.952815 4.121482 -3.262146  | H -7.613770 2.599323 -3.648315  |
| H -6.377738 2.413979 -3.247919  | H -7.795001 0.886445 -3.288042  |
| H -7.930719 -2.048479 -0.936391 | H -8.303518 -3.209661 -0.203482 |
| H -7.060910 -1.710664 -2.443164 | H -7.635103 -3.202872 -1.843401 |
| H -7.048970 -3.355171 -1.745816 | H -7.368881 -4.607024 -0.772772 |
| H -8.325194 3.801066 -2.520479  | H -9.779730 2.162359 -2.465034  |
| H -7.781000 2.783526 -1.163095  | H -8.901586 1.470399 -1.077984  |
| H -7.357285 4.507080 -1.200953  | H -8.727788 3.194785 -1.462936  |
| H -2.883921 -4.980965 0.877560  | H -2.618640 -5.147608 1.300627  |
| H 1.332715 6.928512 1.838020    | H 0.029542 6.925494 -0.816076   |
| H 2.258782 5.326878 2.016619    | H 1.113442 5.506734 -0.302737   |
| H -0.763238 5.775871 1.591487   | H -1.964636 5.668079 -0.356006  |
| O -5.584375 -5.174287 0.236581  | O -5.308955 -5.843926 1.082472  |
| H -3.811917 -4.669070 2.346798  | H -3.420078 -4.728714 2.818574  |
| H -6.336271 0.570812 -1.895666  | H -7.286587 -0.682204 -1.701027 |
| H -3.491418 0.048006 0.421113   | H -4.093088 -0.425359 0.143072  |
| H -1.672514 0.993860 1.131585   | H -2.421869 0.889107 0.677365   |
| N 1.847893 0.056437 3.005723    | N 1.142860 0.981269 2.742390    |
| C 2.870715 0.226649 2.057171    | C 2.202259 0.483469 2.133023    |
| O 2.884632 1.119043 1.207674    | O 2.277329 -0.171329 1.064979   |
| C 4.229348 -0.322936 2.569150   | C 3.536548 0.744739 2.892314    |
| F 4.804075 0.623880 3.384412    | F 3.677749 2.029282 3.304406    |
| F 4.128635 -1.454419 3.318795   | F 3.649901 -0.051368 3.988754   |
| F 5.093018 -0.549459 1.567665   | F 4.608385 0.471051 2.092907    |
| H 2.003006 -0.774232 3.571843   | H 1.127914 1.605722 4.052181    |
| K 2.482530 -0.095902 -1.192676  | K 3.830139 -0.162859 -1.048560  |
| O 0.767272 2.247761 -1.692965   | O 2.908298 2.533645 -1.270720   |
| C 1.315629 3.564124 -1.761501   | C 3.859244 3.594193 -1.346359   |
| C 2.608392 3.601972 -0.985556   | C 5.031789 3.259926 -0.455737   |
| O 3.560494 2.792113 -1.676786   | O 5.690425 2.117848 -1.004568   |
| C 4.829368 2.741875 -1.025053   | C 6.866324 1.739768 -0.287204   |
| C 5.728178 1.824454 -1.818670   | C 7.514966 0.593857 -1.024928   |
| O 5.235216 0.490585 -1.710885   | O 6.654166 -0.547611 -0.977886  |
| C 5.963272 -0.433412 -2.512308  | C 7.102568 -1.590839 -1.844522  |
| C 5.497900 -1.835542 -2.206189  | C 6.220429 -2.804085 -1.690134  |
| O 4.154055 -2.031813 -2.658372  | O 4.895561 -2.536114 -2.166165  |
| C -0.307516 2.069136 -2.608709  | C 1.846356 2.676018 -2.216242   |
| C -0.974933 0.744293 -2.352719  | C 0.812898 1.609430 -1.964960   |
| O -0.088112 -0.346742 -2.642638 | O 1.309255 0.309598 -2.319883   |
| C 3.765096 -3.397640 -2.449384  | C 4.131674 -3.753346 -2.188195  |
| C 2.361458 -3.651793 -2.975426  | C 2.714689 -3.521217 -2.687304  |
| N 1.262729 -3.175833 -2.108937  | N 1.782892 -2.816984 -1.777936  |
| C 0.031328 -2.791273 -2.846091  | C 0.710759 -2.059193 -2.475296  |
| C -0.782462 -1.575184 -2.426539 | C 0.322901 -0.672895 -1.981861  |
| H 0.604341 4.295790 -1.332608   | H 3.404130 4.547689 -1.015513   |

|                                 |                                 |
|---------------------------------|---------------------------------|
| H 1.506297 3.841711 -2.816213   | H 4.208588 3.724355 -2.388414   |
| H 2.450800 3.219137 0.038335    | H 4.688836 3.051133 0.575933    |
| H 2.960657 4.650293 -0.922422   | H 5.719584 4.125670 -0.419712   |
| H 4.711473 2.361919 0.006315    | H 6.611100 1.445061 0.747925    |
| H 5.285566 3.750626 -0.984411   | H 7.579998 2.583945 -0.238248   |
| H 6.760282 1.885303 -1.422011   | H 8.490560 0.358269 -0.559314   |
| H 5.747909 2.141655 -2.879809   | H 7.695415 0.887350 -2.076487   |
| H 7.045896 -0.371752 -2.286190  | H 8.139264 -1.883294 -1.589617  |
| H 5.825759 -0.204955 -3.587640  | H 7.094657 -1.240412 -2.894760  |
| H 5.561694 -2.021983 -1.116860  | H 6.184754 -3.119317 -0.629824  |
| H 6.173807 -2.549224 -2.716272  | H 6.669045 -3.630237 -2.274082  |
| H 0.063139 2.126676 -3.651114   | H 2.241619 2.611093 -3.248426   |
| H -1.070887 2.859786 -2.471340  | H 1.355790 3.661018 -2.098733   |
| H -1.876906 0.674311 -2.990888  | H -0.090929 1.839132 -2.560858  |
| H -1.311165 0.690456 -1.301728  | H 0.532810 1.619385 -0.897410   |
| H 3.842476 -3.650487 -1.380777  | H 4.130151 -4.213921 -1.189861  |
| H 4.457586 -4.059091 -3.005719  | H 4.609853 -4.462774 -2.891236  |
| H 2.261383 -4.737550 -3.147704  | H 2.303721 -4.514036 -2.943323  |
| H 2.262395 -3.147518 -3.946006  | H 2.768662 -2.935880 -3.615162  |
| H -0.672176 -3.643231 -2.863625 | H -0.212624 -2.663354 -2.493571 |
| H 0.337297 -2.625346 -3.887335  | H 1.027892 -1.954161 -3.521307  |
| H -1.119258 -1.620612 -1.377937 | H 0.135781 -0.638724 -0.897484  |
| H -1.695928 -1.596356 -3.054827 | H -0.629747 -0.419223 -2.487749 |
| F 2.551322 -1.458425 1.000579   | F 1.040011 2.050608 4.985410    |
